# Supplementary material for: Continuity of care and delivery of diabetes and hypertensive care among regular users of primary care services in Chile: a cross-sectional study
Source: PubMed Central journal article supplement — BMJ Open. 2019 Oct 28;9(10):e027830. doi: 10.1136/bmjopen-2018-027830 (PMC6830596; doi:10.1136/bmjopen-2018-027830), 2019-10-28
Supplement: bmjopen-2018-027830.draft_revisions.pdf [file bmjopen-2018-027830.draft_revisions.pdf]

# BMJ Open

BMJ Open is committed to open peer review. As part of this commitment we make the peer review history of every article we publish publicly available.

When an article is published we post the peer reviewers' comments and the authors' responses online. We also post the versions of the paper that were used during peer review. These are the versions that the peer review comments apply to.

The versions of the paper that follow are the versions that were submitted during the peer review process. They are not the versions of record or the final published versions. They should not be cited or distributed as the published version of this manuscript.

BMJ Open is an open access journal and the full, final, typeset and author-corrected version of record of the manuscript is available on our site with no access controls, subscription charges or pay-per-view fees (<http://bmjopen.bmj.com>).

If you have any questions on BMJ Open's open peer review process please email [info.bmjopen@bmj.com](mailto:info.bmjopen@bmj.com)

# BMJ Open

## **Continuity of care and delivery of diabetes and hypertensive care among users of public healthcare services in Chile, a cross-sectional study.**

|                               |                                                                                                                                                               |
|-------------------------------|---------------------------------------------------------------------------------------------------------------------------------------------------------------|
| Journal:                      | <i>BMJ Open</i>                                                                                                                                               |
| Manuscript ID                 | bmjopen-2018-027830                                                                                                                                           |
| Article Type:                 | Research                                                                                                                                                      |
| Date Submitted by the Author: | 09-Nov-2018                                                                                                                                                   |
| Complete List of Authors:     | Leniz, Javiera; King's College London, Cicely Saunders Institute of Palliative Care, Policy & Rehabilitation<br>Gulliford, Martin; King's College London, UK, |
| Keywords:                     | continuity of care, disease management, diabetes mellitus, Hypertension < CARDIOLOGY, health survey                                                           |
|                               |                                                                                                                                                               |

SCHOLARONE™  
Manuscripts

1  
2  
3 **Title: Continuity of care and delivery of diabetes and hypertensive care among users of public**  
4 **healthcare services in Chile, a cross-sectional study.**  
5

6  
7 **Authors:**  
8

- 9 1. Javiera Leniz, MSc Public Health student, King's College London, UK  
10  
11  
12 2. Professor Martin Gulliford, Professor of Public Health, Department Primary Care & Public  
13 Health Sciences, King's College London, UK  
14  
15

16  
17  
18  
19 Corresponding author: Javiera Leniz, Cicely Saunders Institute of Palliative Care, Polity & Rehabilitation,  
20 Bessemer Road, London SE5 9PJ, UK, email [javiera.martelli@kcl.ac.uk](mailto:javiera.martelli@kcl.ac.uk), telephone number:  
21 +4402078485636  
22

23  
24 Word count: 2,999  
25  
26  
27  
28  
29  
30  
31  
32  
33  
34  
35  
36  
37  
38  
39  
40  
41  
42  
43  
44  
45  
46  
47  
48  
49  
50  
51  
52  
53  
54  
55  
56  
57  
58  
59  
60

## ABSTRACT

**Objectives:** to explore factors related to continuity of care and its association with delivery of diabetes and hypertensive care.

**Design:** a cross-sectional study.

**Setting:** data from the Chilean Health National Survey in 2009-2010.

**Participants:** users of the public healthcare sector aged 15 or older.

**Primary and secondary outcome measures:** continuity of care levels were constructed from self-reports of affiliation with a usual doctor. Logistic regression was used to explore the association between continuity of care, sociodemographic characteristics, diabetes, and hypertensive medical care and control.

**Results:** 3,887 public healthcare users respondent to the doctor affiliation's question were identified. 14.7% recognised a usual GP and 82.3% of them knew their name. Continuity of care was positively associated with age > 65 years (OR 4.81, 95% CI 3.16 to 7.32), being female (OR 1.66, 95% CI 1.34 to 2.05), retired (OR 2.22, 95% CI 1.75 to 2.83), obese (OR 1.66, 95% CI 1.29 to 2.14), high cardiovascular risk (OR 2.98, 95% CI 2.13 to 4.17) and widowed (OR 1.50, 95% CI 1.13 to 1.99), and negatively associated with educational level (8-12 vs <8 years OR 0.79, 95% CI 0.64 to 0.97), smoking (OR 0.65, 95% CI 0.52 to 0.82) and physical activity (OR 0.76, 95% CI 0.61 to 0.95). In diabetic patients, continuity of care was associated with diagnosis awareness (OR 2.83, 95% CI 1.21 to 6.63), treatment (OR 2.04, 95% CI 1.15 to 3.63), and a recent foot (OR 3.17, 95% CI 1.84 to 5.45) and ophthalmologic exam (OR 3.20, 95% CI 1.66 to 6.18). In hypertensive patients, continuity of care was not associated with diagnosis awareness, treatment or blood pressure control.

**Conclusions:** Continuity of care was not associated with better chronic diseases control. Findings suggest patients with chronic conditions have better continuity of care access.

## Keywords

Continuity of Patient Care; Chronic disease; Health surveys; Disease Management.

### Strengths and limitations of this study

- First study that explores continuity of care and its relationship with health outcomes in Chile.
- The study uses a nationally representative population-based sample.
- The data used combine clinical and sociodemographic variables.
- The cross-sectional design of this study does not allow to attribute causal relationships.
- Some self-reported variables might be affected by recall bias.

For peer review only

## BACKGROUND

Chronic diseases and long-term conditions, including cancers and circulatory diseases, account for 19% of the global burden of disease, followed closely by mental disorders.<sup>1</sup> Despite the availability of effective treatment, a significant proportion of patients do not achieve adequate levels for disease control measures.<sup>2-5</sup> Effective preventive medical interventions are available for reducing the risk of certain cancers and cardiovascular diseases.<sup>7-12</sup> Several authors have highlighted the role of the health system structure in the achievement of optimal outcomes for chronic diseases, especially in primary care.<sup>13-16</sup> One of the main attributes of a primary care-oriented service is the long-term person-focused care.<sup>15 17</sup>

Continuity of care can be defined as a long-term relationship between physicians and patients.<sup>18 19</sup> It has been associated with greater patient satisfaction, improved delivery of preventive services and lower rates of hospitalization.<sup>20 21</sup> Results from research focused on patients with chronic conditions suggest that continuity of care is correlated with fewer visits to emergency departments and better glycosylate haemoglobin (HbA1c) control in diabetic patients.<sup>22</sup> However, the quality of the evidence regarding the impact of continuity of care on health care outcomes is controversial and based mainly on observational studies from high-income countries. There is, therefore, an important gap of information regarding continuity of care in other settings. Due to the nature of the concept of continuity of care and the cultural differences that might determine patients and doctors' expectations about healthcare, evidence from developed countries might not be applicable in low-income contexts.

Chile is an OECD country where the burden of disease is similar to that observed in countries that are in an advanced stage of the epidemiological transition. Ischaemic heart diseases and stroke are the leading causes of death in the population, followed closely by cancer.<sup>23</sup> Even though continuity of care has been identified as a major challenge in Chile,<sup>24 25</sup> there are no studies assessing the level of relational continuity of care in the health system and their impact on clinical outcomes. The aim of this research is to explore factors related with different levels of continuity of care measured and its association with outcomes in chronic cardiovascular diseases and uptake of preventive services in users of the public health care system in Chile.

## METHODS

This cross-sectional study drew on data from the last Health National Survey performed in Chile.

### **The Chilean Health National Survey 2009-2010.**

The second version of the Health National Survey was conducted in 2009 and commissioned by the Ministry of Health. The survey was designed to be nationally representative; individuals from the general population from 15 years old and older were included. The sample of the HNS 2009 was a multistage sample of households and disproportionately stratified by geographic region and urban/rural area, using the Census population as a frame. The response rate was 75.3%, and the loss rate after the recruitment was 8.7%. The final survey sample size includes 5,293 individuals. Survey instruments included 42 health problems, five physiological measurements, and 17 biochemical measurements. The survey participants were interviewed in their homes, with an average of two home visits per individual. During the first home visit, they were invited to participate, signed the informed consent and answered a validated questionnaire administrated by trained interviewers. During the second home visit, a nurse performed a set of blood and urine tests, as well as anthropometric measurements.<sup>26</sup>

### **Population and sample**

For this study, only users of the public health care system were analysed because the questions regarding continuity of care were asked only to users of the public health care system. Therefore, the study population corresponds to individuals with public insurance. A sample size was calculated for diabetes control and systolic blood pressure as the main outcomes. The study had more than 80% power to detect odds ratios of 1.5 and above.

### **Instruments and measurements**

#### Continuity of Care

Two questions were used to assess the level of continuity of care among participants. The first one was 'Do you have your 'own' general doctor or family doctor? The question specified in brackets that a general doctor is the one they can appeal to solve the majority of their health problems. The second question asked whether or not individuals who referred having an 'own doctor' also knew the name of that doctor. A measure of continuity of care was constructed from these two questions. Three categories of continuity of care were considered. First, individuals who reported having a GP whose name they know. Second, individuals who report having a GP, but do not know his/her name. And finally, individuals who do not have a particular GP.

## Cardiovascular variables

Blood pressure and hypertension management were assessed through questionnaires and direct measurement of blood pressure at home. Questionnaires included questions about self-reported diagnosis and treatment of hypertension. Individuals were considered as having hypertension if they had a mean systolic blood pressure higher than 140 mmHg and/or a mean diastolic blood pressure higher than 90 mmHg or were receiving pharmacological treatment at the time of the visit. A fasting blood sample was taken from each participant during the second home visit. Blood glucose and glycated haemoglobin (HbA1c) were estimated. Questions about self-reported diagnosis and treatment of diabetes were included in the survey. Individuals that referred to having been diagnosed with diabetes were asked about the last time they received a foot examination and an ophthalmological exam, as well as the treatment received. Individuals were considered as having diabetes mellitus if they had fasting blood glucose higher than 126 mg/dl or reported that they had been diagnosed with diabetes before the visit.

Cardiovascular risk was calculated from data related to the individual's age, cholesterol level, smoking status and blood pressure using the Framingham equation. Individuals with a probability of having a cardiovascular event less than 10%, between 10% and 20%, and more than 20% in 10 years, were considered as having a low, high, and very high cardiovascular risk respectively. The Spanish version of the global physical activity questionnaire (GPAQ) was used. The GPAQ considers three domains of physical activity: at work while commuting and during recreational activity. The sum of the three activities determines the level of physical activity of an individual. A tobacco exposure module was included in the first visit that considered basic questions about smoking, based on the minimum instrument (core questions) surveillance smoking used by the Pan-American health organization. The questions identified two categories: current smoker (daily and occasional) and former smoker.

## Analysis

A descriptive analysis was performed for all variables included in the study according to the level of continuity of care. Univariate analysis using logistic regression was performed to evaluate the association between continuity of care and categorical variables. And ANOVA test was performed to analyse the association between continuous variables with continuity of care. Demographic variables that were associated with both continuity of care and the outcomes were considered as possible confounders and were therefore used to fix the model for multivariate analysis. A multivariate logistic regression analysis was used to explore the relationship between the level of continuity of care and the different outcomes, adjusting for confounders. A backward approach was used to fix the multivariate logistic regression. All variables that were related to continuity of care and the respective outcome



1  
2  
3 were included in the first model. Explanatory variables were kept in the model based on a priori  
4 hypothesis and significance in multivariate analysis ( $p$ -value < 0.2). Individuals that did not respond to  
5 the question 'Do you have a family physician or GP?' were excluded from the analysis. The 0.99.902 - ©  
6 2009-2016 version of the statistical software R was used for the analysis.  
7  
8

## 10 RESULTS

11  
12  
13 A total of 4,264 individuals from the Health National Survey reported that they used the public  
14 healthcare sector and were selected for the current study. Among them, 3,887 individuals responded to  
15 the question 'Do you have you a family physician or GP?', and therefore, 377 individuals were excluded  
16 and considered as missing values (Supplementary material, figure 1).  
17  
18

19  
20 There were 572(14.7%) of the individuals included in the Health National Survey who affirmed having a  
21 GP as a usual doctor, and 471(82.3%) of these affirmed knowing the name of their doctor (Table 1).  
22 Individuals who indicated having a GP as a usual doctor and knowing their name had greater odds of  
23 age greater than 65 years (OR 4.81, 95% CI 3.16 to 7.32), female gender (OR 1.66, 95% CI 1.34 to 2.05),  
24 being widowed (OR 1.50, 95% CI 1.13 to 1.99), being retired (OR 2.22, 95% CI 1.75 to 2.83), having a  
25 high (OR 1.88, 95% CI 1.53 to 2.32) or very high cardiovascular risk (OR 2.98, 95% CI 2.13 to 4.17), or  
26 having a BMI > 30 (OR 1.66, 95% CI 1.29 to 2.14). Individuals with more than eight years of education,  
27 single people, and those with moderate and high level of physical activity were less likely to mention  
28 having a GP as a usual doctor. Recognizing the name of their regular doctor was also highly associated  
29 with cardiovascular risk factors, with lower odds of having a high level of physical activity, greater odds  
30 of being obese or having a diagnosis of diabetes or hypertension. Having a regular doctor was not  
31 associated with rurality or household income (Table 1).  
32  
33  
34  
35  
36  
37  
38  
39  
40  
41  
42  
43  
44  
45  
46  
47  
48  
49  
50  
51  
52  
53  
54  
55  
56  
57  
58  
59  
60

**Table 1. Univariate association between level of continuity of care and categorical variables.**

|                              | Do you have your family doctor?                        |                               |                               |                                  |                           |                     |
|------------------------------|--------------------------------------------------------|-------------------------------|-------------------------------|----------------------------------|---------------------------|---------------------|
|                              | No                                                     | Yes, but not know the name    | Yes, and know the name        | Yes, but do not know the name/No | Yes, and know the name/No |                     |
|                              | (n=3,315)<br>n (%) <sup>a</sup>                        | (n=101)<br>n (%) <sup>a</sup> | (n=471)<br>n (%) <sup>a</sup> | OR (95% CI)                      | OR (95% CI)               |                     |
| Age                          |                                                        |                               |                               |                                  |                           |                     |
|                              | <25                                                    | 546 (16.5)                    | 9 (8.9)                       | 28 (5.9)                         | Ref                       | Ref                 |
|                              | 25 to 45                                               | 1,128 (34.0)                  | 26 (25.7)                     | 124 (26.3)                       | 1.40 (0.66 to 3.01)       | 2.14 (1.40 to 3.27) |
|                              | 46 to 65                                               | 1,041 (31.4)                  | 40 (39.6)                     | 124 (36.3)                       | 2.33 (1.12 to 4.84)       | 3.20 (2.12 to 4.84) |
|                              | >66                                                    | 600 (18.1)                    | 26 (25.7)                     | 148 (31.4)                       | 2.63 (1.22 to 5.66)       | 4.81 (3.16 to 7.32) |
| Rurality (yes)               |                                                        | 574 (17.3)                    | 25 (24.8)                     | 81 (17.2)                        | 1.57 (0.99 to 2.49)       | 0.99 (0.77 to 1.28) |
| Sex (Female)                 |                                                        | 2,005 (60.5)                  | 69 (68.3)                     | 338 (71.8)                       | 1.41 (0.92 to 2.16)       | 1.66 (1.34 to 2.05) |
| Marital Status               |                                                        |                               |                               |                                  |                           |                     |
|                              | Married                                                | 1,804 (54.4)                  | 56 (55.4)                     | 262 (55.6)                       | Ref                       | Ref                 |
|                              | Separated or Divorced                                  | 287 (8.7)                     | 10 (9.9)                      | 51 (10.8)                        | 1.12 (0.57 to 2.23)       | 1.22 (0.88 to 1.69) |
|                              | Single                                                 | 885 (26.7)                    | 20 (19.8)                     | 84 (17.8)                        | 0.73 (0.43 to 1.22)       | 0.65 (0.50 to 0.85) |
|                              | Widowed                                                | 339 (10.2)                    | 15 (14.9)                     | 74 (15.7)                        | 1.43 (0.80 to 2.55)       | 1.50 (1.13 to 1.99) |
| Educational level            |                                                        |                               |                               |                                  |                           |                     |
|                              | < 8 years                                              | 1,018 (30.7)                  | 44 (43.6)                     | 162 (34.5)                       | Ref                       | Ref                 |
|                              | 8 - 12 years                                           | 1,892 (57.1)                  | 52 (51.5)                     | 237 (50.4)                       | 0.64 (0.42 to 0.96)       | 0.79 (0.64 to 0.97) |
|                              | >12 years                                              | 402 (12.1)                    | 5 (5.0)                       | 71 (15.1)                        | 0.29 (0.11 to 0.73)       | 1.11 (0.82 to 1.50) |
| Occupation                   |                                                        |                               |                               |                                  |                           |                     |
|                              | Worker                                                 | 1,499 (45.5)                  | 38 (37.6)                     | 177 (37.7)                       | Ref                       | Ref                 |
|                              | Not worker                                             | 1,237 (37.6)                  | 40 (39.6)                     | 147 (31.3)                       | 1.28 (0.81 to 2.00)       | 1.01 (0.8 to 1.27)  |
|                              | Retired                                                | 556 (16.9)                    | 23 (22.8)                     | 146 (31.1)                       | 1.63 (0.96 to 2.76)       | 2.22 (1.75 to 2.83) |
| Cardiovascular risk          |                                                        |                               |                               |                                  |                           |                     |
|                              | Low                                                    | 1,799 (54.3)                  | 43 (42.6)                     | 174 (36.9)                       | Ref                       | Ref                 |
|                              | High                                                   | 1,322 (39.9)                  | 47 (46.5)                     | 241 (51.2)                       | 1.49 (0.98 to 2.27)       | 1.88 (1.53 to 2.32) |
|                              | Very High                                              | 194 (5.9)                     | 11 (10.9)                     | 56 (11.9)                        | 2.37 (1.20 to 4.68)       | 2.98 (2.13 to 4.17) |
| Level of physical activity   |                                                        |                               |                               |                                  |                           |                     |
|                              | Low                                                    | 1,013 (31.3)                  | 45 (45.5)                     | 162 (35.9)                       | Ref                       | Ref                 |
|                              | Moderate                                               | 625 (19.3)                    | 17 (17.2)                     | 95 (21.1)                        | 0.61 (0.35 to 1.08)       | 0.95 (0.72 to 1.25) |
|                              | High                                                   | 1,601 (49.4)                  | 37 (37.4)                     | 194 (43.0)                       | 0.52 (0.33 to 0.81)       | 0.76 (0.61 to 0.95) |
| Current smoker (yes)         |                                                        | 1,140 (35.2)                  | 30 (30.9)                     | 120 (26.3)                       | 0.82 (0.53 to 1.27)       | 0.65 (0.52 to 0.82) |
| Nutritional status           |                                                        |                               |                               |                                  |                           |                     |
|                              | BMI <25                                                | 943 (31.3)                    | 20 (22.5)                     | 112 (25.7)                       | Ref                       | Ref                 |
|                              | BMI 25 to 29.9                                         | 1,199 (39.8)                  | 35 (39.3)                     | 151 (34.7)                       | 1.38 (0.80 to 2.40)       | 1.06 (0.82 to 1.37) |
|                              | BMI >30                                                | 873 (29.0)                    | 34 (38.2)                     | 172 (39.5)                       | 1.84 (1.05 to 3.22)       | 1.66 (1.29 to 2.14) |
| Household income             |                                                        |                               |                               |                                  |                           |                     |
|                              | US\$<374                                               | 2,084 (64.9)                  | 78 (78.8)                     | 278 (61.2)                       | Ref                       | Ref                 |
|                              | US\$ 374 to 1268                                       | 1,072 (33.4)                  | 19 (19.2)                     | 163 (35.9)                       | 0.47 (0.29 to 0.79)       | 1.14 (0.93 to 1.40) |
|                              | >US\$1268                                              | 55 (1.7)                      | 2 (2.0)                       | 13 (2.9)                         | 0.97 (0.23 to 4.06)       | 1.77 (0.96 to 3.28) |
| DM diagnosis (Yes)           |                                                        | 328 (11.1)                    | 15 (17.4)                     | 75 (17.3)                        | 1.70 (0.96 to 2.99)       | 1.68 (1.27 to 2.20) |
|                              | Years since diagnosis DM (mean (sd)) (n=327)           | 8.8(9.9)                      | 9.3(5.9)                      | 10.9(9.0)                        |                           |                     |
|                              | HbA1c (mean (sd)) (n=348)                              | 8.4(2.5)                      | 7.8(2.2)                      | 8.8(2.4)                         |                           |                     |
| Hypertension diagnosis (Yes) |                                                        | 994 (32.2)                    | 38 (40.0)                     | 220 (49.4)                       | 1.40 (0.93 to 2.13)       | 2.06 (1.68 to 2.52) |
|                              | Years since diagnosis hypertension (mean (sd)) (n=872) | 11.1(12.2)                    | 13.6(15.0)                    | 10.7(9.8)                        |                           |                     |
|                              | PAS (mmHg) (mean(sd)) (n=1,194)                        | 152.0(21.6)                   | 149.7(23.8)                   | 150.5(20.4)                      |                           |                     |
|                              | PAD (mmHg) (mean(sd)) (n=1,194)*                       | 84.4(11.9)                    | 80.9(12.0)                    | 81.9(11.6)                       |                           |                     |

<sup>a</sup> column percent. BMI: Body mass index; DM: diabetes mellitus; Ref: reference. \*ANOVA p-value<0.01

1  
2  
3 A total of 418 (10.8%) diabetic and 1,252 (32.2%) hypertensive individuals were identified in the survey.  
4  
5 Among individuals classified as having diabetes, 324 (78.6%) were aware of a diabetes diagnosis, and  
6  
7 234 (56.0%) were receiving pharmacological treatment at the time of the survey. Among individuals  
8  
9 classified as having hypertension, 891 (71.2%) were aware of a hypertension diagnosis, and 565 (45.1%)  
10  
11 were receiving pharmacological treatment at the time of the survey.

12  
13 There were 90(21.5%) diabetic patients that referred to having a usual GP. Continuity of care was not  
14  
15 associated with optimal levels of glycemc control (Table 2). Individuals that had a personal GP and  
16  
17 knew their name were 2.04 (95% CI 1.15 to 3.63) more likely to be receiving pharmacological treatment  
18  
19 for diabetes and 2.83 (95% CI 1.21 to 6.63) more likely of being aware of their diagnosis than individuals  
20  
21 without a usual GP, after adjusting for confounders. They were also more likely to have had a recent  
22  
23 foot exam (OR 0.67, 95% CI 0.36 to 1.23) and a recent ophthalmologic exam (OR 3.17, 95% CI 1.84 to  
24  
25 5.45) than individuals without a usual GP.

26  
27 There were 258(20.6%) hypertensive patients that referred to having a usual GP. Continuity of care was  
28  
29 not associated with being more aware of their diagnosis, receiving pharmacological treatment or better  
30  
31 blood pressure control for these patients (Table 2).  
32  
33  
34  
35  
36  
37  
38  
39  
40  
41  
42  
43  
44  
45  
46  
47  
48  
49  
50  
51  
52  
53  
54  
55  
56  
57  
58  
59  
60

**Table 2. Univariate and multivariate logistic regression between relational continuity of care and cardiovascular outcomes.**

|                                                            |                    |                    |                               |                        | Univariate                       |                           | Multivariate                  |                        |
|------------------------------------------------------------|--------------------|--------------------|-------------------------------|------------------------|----------------------------------|---------------------------|-------------------------------|------------------------|
|                                                            |                    | No                 | Yes, but do not know the name | Yes, and know the name | Yes, but do not know the name/No | Yes, and know the name/No | Yes, but do not know the name | Yes, and know the name |
|                                                            | n (%) <sup>a</sup> | n (%) <sup>a</sup> | n (%) <sup>a</sup>            | OR (95% CI)            | OR (95% CI)                      | OR (95% CI)               | OR (95% CI)                   |                        |
| Patients with knowledge of their diagnosis of DM-2         |                    |                    |                               |                        |                                  |                           |                               |                        |
|                                                            | No                 | 79 (89.8)          | 2 (2.3)                       | 7 (8.0)                | Ref                              | Ref                       | Ref <sup>1</sup>              | Ref <sup>1</sup>       |
|                                                            | Yes                | 245 (75.6)         | 13 (4.0)                      | 66 (20.4)              | 2.10 (0.46 to 9.49)              | 3.04 (1.34 to 6.90)       | 1.68 (0.34 to 8.40)           | 2.83 (1.21 to 6.63)    |
| Patients under treatment for DM-2                          |                    |                    |                               |                        |                                  |                           |                               |                        |
|                                                            | No                 | 158 (85.9)         | 5 (2.7)                       | 21 (11.4)              | Ref                              | Ref                       | Ref <sup>2</sup>              | Ref <sup>2</sup>       |
|                                                            | Yes                | 170 (72.6)         | 10 (4.3)                      | 54 (23.1)              | 1.86 (0.62 to 5.56)              | 2.39 (1.40 to 4.14)       | 1.71 (0.53 to 5.44)           | 2.04 (1.15 to 3.63)    |
| Patients with diagnosis of diabetes and HbA1c <7%          |                    |                    |                               |                        |                                  |                           |                               |                        |
|                                                            | No                 | 164 (76.6)         | 7 (3.3)                       | 43 (20.1)              | Ref                              | Ref                       | Ref <sup>3</sup>              | Ref <sup>3</sup>       |
|                                                            | Yes                | 108 (80.6)         | 6 (4.5)                       | 20 (14.9)              | 1.30 (0.43 to 3.98)              | 0.71 (0.39 to 1.27)       | 1.48 (0.43 to 5.13)           | 0.67 (0.36 to 1.23)    |
| Diabetic patients with last FE <1 year ago                 |                    |                    |                               |                        |                                  |                           |                               |                        |
|                                                            | No                 | 208 (86.7)         | 6 (2.5)                       | 26 (10.8)              | Ref                              | Ref                       | Ref <sup>4</sup>              | Ref <sup>4</sup>       |
|                                                            | Yes                | 120 (67.4)         | 9 (5.1)                       | 49 (27.5)              | 2.60 (0.90 to 7.48)              | 3.27 (1.93 to 5.53)       | 2.38 (0.81 to 7.00)           | 3.17 (1.84 to 5.45)    |
| Diabetic patients with last OE <2 years ago                |                    |                    |                               |                        |                                  |                           |                               |                        |
|                                                            | No                 | 197 (83.8)         | 6 (2.6)                       | 32 (13.6)              | Ref                              | Ref                       | Ref <sup>5</sup>              | Ref <sup>5</sup>       |
|                                                            | Yes                | 129 (71.3)         | 9 (5.0)                       | 43 (23.8)              | 3.30 (1.03 to 10.60)             | 3.43 (1.87 to 6.30)       | 3.67 (1.03 to 13.04)          | 3.20 (1.66 to 6.18)    |
| Patients with knowledge of their diagnosis of hypertension |                    |                    |                               |                        |                                  |                           |                               |                        |
|                                                            | No                 | 300 (83.1)         | 8 (2.2)                       | 53 (14.7)              | Ref                              | Ref                       | Ref <sup>6</sup>              | Ref <sup>6</sup>       |
|                                                            | Yes                | 694 (77.9)         | 30 (3.4)                      | 167 (18.7)             | 1.62 (0.75 to 3.58)              | 1.36 (0.97 to 1.91)       | 1.43 (0.60 to 3.42)           | 1.15 (0.80 to 1.67)    |
| Patients report receiving treatment for hypertension       |                    |                    |                               |                        |                                  |                           |                               |                        |
|                                                            | No                 | 568 (82.7)         | 14 (2.0)                      | 105 (15.3)             | Ref                              | Ref                       | Ref <sup>7</sup>              | Ref <sup>7</sup>       |
|                                                            | Yes                | 426 (75.4)         | 24 (4.2)                      | 115 (20.4)             | 2.29 (1.17 to 4.47)              | 1.46 (1.09 to 1.96)       | 2.19 (1.10 to 4.40)           | 1.25 (0.91 to 1.71)    |
| Patients with diagnoses of hypertension and BP <140/90     |                    |                    |                               |                        |                                  |                           |                               |                        |
|                                                            | No                 | 819 (79.4)         | 29 (2.8)                      | 184 (17.8)             | Ref                              | Ref                       | Ref <sup>8</sup>              | Ref <sup>8</sup>       |
|                                                            | Yes                | 175 (79.5)         | 9 (4.1)                       | 36 (16.4)              | 1.45 (0.68 to 3.12)              | 0.92 (0.62 to 1.36)       | 1.83 (0.80 to 4.16)           | 0.65 (0.42 to 1.02)    |

<sup>a</sup> row percent. DM-2: diabetes mellitus type 2, HbA1c: Glycosylate haemoglobine, FE: Foot examination, OE: ophthalmologic examination, BP: Blood pressure. 1 Adjusted for age, sex, marital status, physical activity and smoking status 2 Adjusted for age, sex, marital status, educational level and smoking status. 3 Adjusted for age, sex, smoking status and BMI. 4 Adjusted for age, sex, marital status and occupation. 5 Adjusted for age, sex, occupation and BMI. 6 Adjusted for age, sex, marital status, educational level, BMI, smoking status and occupation. 7 Adjusted for age, sex, marital status, educational level, occupation and smoking status. 8 Adjusted for age, sex, marital status, educational level, BMI and physical activity.

## DISCUSSION

### Summary of findings

This study evaluated continuity of care and its relationship with health outcomes in the Chilean public health sector. Continuity of care in this study was positively associated with age, sex, occupation, nutritional, cardiovascular risk and marital status, and negatively associated with educational level, smoking and physical activity. Patients with diabetes or hypertension diagnosis were more likely to know the name of their usual GP.

Regarding chronic disease management, in diabetic patients, continuity of care was associated with receiving treatment and being aware of diabetes diagnosis, and higher odds of having a recent foot and ophthalmologic exam. In hypertensive patients, continuity of care was not associated with higher odds of being aware of their diagnosis, receiving pharmacological treatment or better levels of blood pressure control.

Individuals that knew the name of their usual GP were more likely to be retired, widowed and older, which might have some implications regarding access to healthcare. People without a regular job might have more time to ask for an appointment or attend medical appointments. However, it is likely that being retired is also associated with age and chronic conditions. It is also possible that older adults might have a greater preference for having a usual GP and they consequently make efforts to achieve a better continuity of care. Individuals who knew the name of their usual GP were more likely to have high cardiovascular risk factors, such as having a diagnosis of diabetes, hypertension, obesity and lower levels of physical activity. This association could be explained because health care provision is usually based on need, and therefore, patients with chronic conditions tend to have better access to health care and visit their doctor more regularly than other non-chronic patients. However, in absolute terms, only around 20% of patients with diabetes and hypertension in this study referred to know the name and having a regular doctor.

This study failed to prove an association between continuity of care and better patients outcomes such as diabetes and hypertension control. This probably could be explained because health care centres prioritise appointments and follow-ups for patients with poor clinical outcomes to improve their management. However, the cross-sectional design of this study does not allow to attribute a causal relationship to this association. These results are consistent with those found in Gulliford et al.,<sup>27</sup> where experienced continuity of care was not associated with the level of HbA1c. But differ from those obtained in two other observational studies where individuals with a usual provider had 6.69 more chances to have an Hb1C level below 7%,<sup>28</sup> or better continuity score was statistically associated with

1  
2  
3 lower levels of HbA1c.<sup>29</sup> Results from these studies are difficult to compare due to the fact that they  
4 used different measurements for continuity of care, as well as different methodologies.  
5

6  
7 The proportion of individuals that referred to having a usual GP in this sample was unusually low  
8 (14.7%). Studies from the US and the UK have reported much higher rates of having a regular doctor,  
9 between 44% and 86%.<sup>28 30 31</sup> Although there might be methodological differences that can explain  
10 these disparate results, it is highly possible that these discrepancies can be explained by differences in  
11 the structure and resources of the health care system among countries. Chile reported some physicians  
12 per 1,000 population of 1.87 in 2013, in contrast with 3.72 and 3.3 per 1,000 population in the UK and  
13 the US respectively.<sup>32</sup> Therefore, it is possible that the lower density of physicians in the country hinders  
14 the ability to maintain an adequate continuity of care, giving priority to maintaining adequate access to  
15 health care.  
16  
17  
18  
19  
20  
21

### 22 **Strengths and limitations**

23  
24  
25 The measure of continuity of care used in the study has some limitations that can account for these  
26 results. Patients' report of provider affiliation does not capture the length and strength of that  
27 relationship, which seems to be a major dimension of continuity of care. Additionally, recognizing a  
28 usual provider does not necessarily imply frequent consultations or real contact with the provider, nor  
29 the quality of care provided, factors that could be substantial in improving health outcomes. Many  
30 other measures of continuity of care have been described in the literature. Nevertheless, no other  
31 single measure has proven to be superior to the others or capture the whole concept of continuity of  
32 care. The measure of continuity used in this analysis has the advantage of considering the patient's  
33 perspective and of being easy to implement and simple to understand and has been widely employed in  
34 the literature allowing comparisons with other studies.  
35  
36  
37  
38  
39  
40  
41

42  
43 The fact that some individuals know or not know the name of their usual doctor, could be perceived as  
44 constituting different levels of continuity of care, assuming that patients that know the name of their  
45 doctors have a stronger relationship with them. However, the results fail to show any gradient effect  
46 among the different levels of continuity of care used in the study. These results might be explained by  
47 the low number of individuals belonging to that category. Only 101(2.6%) persons in the sample  
48 referred to having their GP but not knowing his/her name.  
49  
50  
51  
52

53  
54 The study shows that diabetic patients that know the name of their GP had 3.3 times more chances of  
55 having had a foot screening in the previous year and 3.6 times more chances of having had an  
56 ophthalmological exam in the last two years. These findings are consistent with results from a similar  
57 study in Taiwan.<sup>33</sup> Consultations with the same physician over time might contribute to having better  
58 coordination of care, and therefore might facilitate the delivery of appropriate and timely preventive  
59  
60

1  
2  
3 services for diabetes care. Nevertheless, it is not possible to rule out the possibility of a spurious  
4 association between foot examination, ophthalmological exam and continuity due to recall bias. The  
5 uptake of both services in this study was assessed through individuals' self-report. Patients with a usual  
6 GP could have a different care-seeking pattern that predisposes them to be more concerned about  
7 their health and therefore remembered more easily whether they have had a foot examination or not,  
8 compared to patients without a usual provider. A more objective measure of foot and ophthalmological  
9 exam, such as information from administrative data, could help to assess the possibility of recall bias.  
10  
11  
12  
13

## 14 15 **CONCLUSIONS**

16  
17 Continuity of care was not associated either with better control of the disease in diabetic and  
18 hypertensive patients among individuals with public health insurance in Chile. Differences in the age  
19 and occupation among individuals with a regular GP might be related with the presence of a chronic  
20 condition. Findings suggest patients with chronic conditions have better access to continuity of care.  
21  
22  
23

24  
25 Results showed an association between continuity of care and the proportion of diabetic users of the  
26 public health services in Chile receiving treatment for their diseases. However, by measuring both, the  
27 dependent and independent variables at the same time, it is not possible to rule out the possibility of  
28 reverse causation.  
29  
30  
31

32  
33 Only a minority of participants in this survey referred to have a regular doctor. However, the majority of  
34 them are also able to identify their doctor's name. It would be recommendable to explore strategies  
35 that might improve the level of continuity of care experienced by users of the public health care sector  
36 in Chile, such as incentives to improve the availability of physicians in the public sector and reducing the  
37 practice size.  
38  
39  
40

41  
42 Further investigation that incorporates a longitudinal approach would be necessary to clarify whether  
43 or not continuity of care has an impact on health care outcomes in Chile.  
44  
45  
46  
47  
48  
49  
50  
51  
52  
53  
54  
55  
56  
57  
58  
59  
60

## STATEMENTS

### Ethics approval

The Health National Survey 2009-2010 was approved by the Pontifical Catholic University of Chile Ethic Committee and the Ministry of Health on 2009. The authors of the study confirmed that they had guarded the autonomy and confidentiality of patients. The database is anonymized, and therefore there is no access to the identity of the participants. Furthermore, this study does not consider additional data collection. In consideration of that, this study does not require additional ethical approval.

### Consent for publication

Not applicable

### Data sharing statement

The data that support the findings of this study are available from the Epidemiology Department, Ministry of Health in Chile but restrictions apply to the availability of these data, which were used under license for the current study, and so are not publicly available. Data are however available from the authors upon reasonable request and with permission of the Ministry of Health in Chile.

### Competing interest

The author(s) declare(s) that they have no competing interests.

### Funding

No direct funds were assigned to this research project.

### Author contributions

JL contributed to the design, data analysis, interpretation and writing of first and subsequent drafts of the paper. MG contributed to the design, data analysis, interpretation and comments on the first and subsequent drafts of the paper.

### Acknowledgements

The authors would like to acknowledge the support provided by the Epidemiology Department from the Ministry of Health in Chile, by facilitating the access to the database of the National Health Survey 2009-2010 and in particular, to Dr. Dario Lopez.

I would like to express my special gratitude to Dr. Paula Margozzini from the Public Health Department at the Pontifical Catholic University of Chile, for providing the contact with the National Health Survey



1  
2  
3 team, facilitating the access to the Survey questionnaires and her technical support with some specific  
4 aspects of the Survey.  
5

## 6 7 REFERENCES

- 8  
9 1. Murray CJ, Vos T, Lozano R, et al. Disability-adjusted life years (DALYs) for 291 diseases and injuries in  
10 21 regions, 1990-2010: a systematic analysis for the Global Burden of Disease Study 2010.  
11 *Lancet (London, England)* 2012;380(9859):2197. doi: 10.1016/S0140-6736(12)61689-4 [doi]  
12
- 13 2. de Pablos-Velasco P, Parhofer KG, Bradley C, et al. Current level of glycaemic control and its  
14 associated factors in patients with type 2 diabetes across Europe: data from the PANORAMA  
15 study. *ClinEndocrinol(Oxf)* 2014;80(1):47-56. doi: 10.1111/cen.12119  
16
- 17 3. Egan BM, Li J, Qanungo S, et al. Blood pressure and cholesterol control in hypertensive  
18 hypercholesterolemic patients: national health and nutrition examination surveys 1988-2010.  
19 *Circulation* 2013;128(1):29. doi: 10.1161/CIRCULATIONAHA.112.000500 [doi]  
20
- 21 4. Fox KM, Gerber Pharmd RA, Bolinder B, et al. Prevalence of inadequate glycemic control among  
22 patients with type 2 diabetes in the United Kingdom general practice research database: A  
23 series of retrospective analyses of data from 1998 through 2002. *Clin Ther* 2006;28(3):388-95.  
24 doi: 10.1016/j.clinthera.2006.03.005 [published Online First: 2006/06/06]  
25
- 26 5. Kontopantelis E, Springate D, Reeves D, et al. Withdrawing performance indicators: retrospective  
27 analysis of general practice performance under UK Quality and Outcomes Framework. *Bmj*  
28 2014;348:g330. doi: 10.1136/bmj.g330 [published Online First: 2014/01/29]  
29
- 30 6. Becker SA, Foxall M. Theory department. An analysis of health behavior theories applied to breast-  
31 screening behavior for relevance with American Indian women. *Journal of Transcultural Nursing*  
32 2006;17:272-79.  
33
- 34 7. Lin JS, Piper MA, Perdue LA, et al. Screening for Colorectal Cancer: Updated Evidence Report and  
35 Systematic Review for the US Preventive Services Task Force. *JAMA : the journal of the*  
36 *American Medical Association* 2016;315(23):2576. doi: 10.1001/jama.2016.3332 [doi]  
37
- 38 8. Nelson KE, Hersh AL, Nkoy FL, et al. Primary care physician smoking screening and counseling for  
39 patients with chronic disease. *PrevMed* 2015;71:77.  
40
- 41 9. Piper MA, Evans CV, Burda BU, et al. Diagnostic and predictive accuracy of blood pressure screening  
42 methods with consideration of rescreening intervals: a systematic review for the U.S.  
43 Preventive Services Task Force. *Ann Intern Med* 2015;162(3):192. doi: 10.7326/M14-1539 [doi]  
44
- 45 10. Selph S, Dana T, Blazina I, et al. Screening for type 2 diabetes mellitus: a systematic review for the  
46 U.S. Preventive Services Task Force. *Ann Intern Med* 2015;162(11):765. doi: 10.7326/M14-2221  
47 [doi]  
48  
49  
50  
51  
52  
53  
54  
55  
56  
57  
58  
59  
60

11. Shimizu T, Bouchard M, Mavriplis C. Update on age-appropriate preventive measures and screening for Canadian primary care providers. *CanFamPhysician* 2016;62(2):131. doi: 62/2/131 [pii]
12. Whitlock EP, Vesco KK, Eder M, et al. Liquid-based cytology and human papillomavirus testing to screen for cervical cancer: a systematic review for the U.S. Preventive Services Task Force. *Ann Intern Med* 2011;155(10):687. doi: 10.7326/0003-4819-155-10-201111150-00376 [doi]
13. Grembowski D, Schaefer J, Johnson KE, et al. A conceptual model of the role of complexity in the care of patients with multiple chronic conditions. *Med Care* 2014;52 Suppl 3:S7-s14. doi: 10.1097/mlr.0000000000000045 [published Online First: 2014/02/25]
14. Milani RV, Lavie CJ. Health care 2020: reengineering health care delivery to combat chronic disease. *AmJMed* 2015;128(4):337. doi: 10.1016/j.amjmed.2014.10.047 [doi]
15. Starfield B, Shi L, Macinko J. Contribution of primary care to health systems and health. *Milbank Q* 2005;83(3):457. doi: MILQ409 [pii]
16. Wagner EH, Austin BT, Von Korff M. Organizing Care for Patients with Chronic Illness. *Milbank Q* 1996;74(4):511. doi: 10.2307/3350391
17. Starfield B. Primary care: An increasingly important contributor to effectiveness, equity, and efficiency of health services. SESPAS report 2012. *Gaceta Sanitaria* 2012;26(SUPPL.1):20.
18. Gulliford M, Naithani S, Morgan M. What is 'continuity of care'? *J Health Serv Res Policy* 2006;11(4):248. doi: 10.1258/135581906778476490 [doi]
19. Haggerty JL, Reid RJ, Freeman GK, et al. Continuity of care: a multidisciplinary review. *Bmj* 2003;327(7425):1219.
20. Cabana MD, Jee SH. Does continuity of care improve patient outcomes? *JFamPract* 2004;53(12):974. doi: jfp\_1204\_5312i [pii]
21. Saultz JW, Lochner J. Interpersonal continuity of care and care outcomes: a critical review. *Ann Fam Med* 2005;3(2):159. doi: 3/2/159 [pii]
22. Health Quality O. Continuity of care to optimize chronic disease management in the community setting: an evidence-based analysis. *Ontario health technology assessment series* 2013;13(6):1.
23. Deis. Estadísticas de Mortalidad. Departamento de Estadísticas e Información en Salud. Gobierno de Chile 2014 [Available from: <http://www.deis.cl/estadisticas-mortalidad/>].
24. Montero J, Tellez A, Herrera C. Reforma sanitaria chilena y la atención primaria de salud. Algunos aspectos críticos. Temas de la agenda pública. Centro de Políticas Públicas. Pontificia Universidad Católica de Chile 2010.
25. Orrego C, Arancibia E, Contreras JL, et al. Fortalecimiento de la atención primaria de salud: propuestas para mejorar el sistema sanitario chileno. Temas de la agenda pública. Centro de Políticas Públicas. Pontificia Universidad Católica de Chile 2014.

- 1  
2  
3 26. MINSAL. Encuesta Nacional de Salud ENS Chile 2009-2010: Ministerio de Salud. Gobierno de Chile.;  
4 2010 [Available from:  
5 <http://web.minsal.cl/portal/url/item/bcb03d7bc28b64dfe040010165012d23.pdf>.  
6  
7  
8 27. Gulliford MC, Naithani S, Morgan M. Continuity of care and intermediate outcomes of type 2  
9 diabetes mellitus. *Fam Pract* 2007;24(3):245. doi: cmm014 [pii]  
10  
11 28. Mainous AG, 3rd, Koopman RJ, Gill JM, et al. Relationship between continuity of care and diabetes  
12 control: evidence from the Third National Health and Nutrition Examination Survey. *Am J Public*  
13 *Health* 2004;94(1):66.  
14  
15  
16 29. Parchman ML, Pugh JA, Noel PH, et al. Continuity of care, self-management behaviors, and glucose  
17 control in patients with type 2 diabetes. *Med Care* 2002;40(2):137.  
18  
19  
20 30. Lambrew JM, DeFries GH, Carey TS, et al. The effects of having a regular doctor on access to  
21 primary care. *Med Care* 1996;34(2):138.  
22  
23 31. Xu KT. Usual source of care in preventive service use: a regular doctor versus a regular site. *Health*  
24 *services research* 2002;37(6):1509.  
25  
26 32. Oecd. OECD Health Statistics 2015 [Available from: [http://www.oecd-ilibrary.org/social-issues-](http://www.oecd-ilibrary.org/social-issues-migration-health/data/oecd-health-statistics/oecd-health-data-health-care-utilisation_data-00542-en?isPartOf=/content/datacollection/health-data-en)  
27 [migration-health/data/oecd-health-statistics/oecd-health-data-health-care-utilisation\\_data-](http://www.oecd-ilibrary.org/social-issues-migration-health/data/oecd-health-statistics/oecd-health-data-health-care-utilisation_data-00542-en?isPartOf=/content/datacollection/health-data-en)  
28 [00542-en?isPartOf=/content/datacollection/health-data-en](http://www.oecd-ilibrary.org/social-issues-migration-health/data/oecd-health-statistics/oecd-health-data-health-care-utilisation_data-00542-en?isPartOf=/content/datacollection/health-data-en).  
29  
30  
31 33. Kitpinyochai T, Paisansudhi S, Washirasaksiri C, et al. Clinical outcomes of type 2 diabetic patients  
32 before and after attending Siriraj Continuity of Care clinic. *JMedAssocThai* 2013;96 Suppl 2:S82.  
33  
34  
35  
36  
37  
38  
39  
40  
41  
42  
43  
44  
45  
46  
47  
48  
49  
50  
51  
52  
53  
54  
55  
56  
57  
58  
59  
60

## SUPPLEMENTARY MATERIAL

**Figure 1. Flowchart of the sample included in the study.**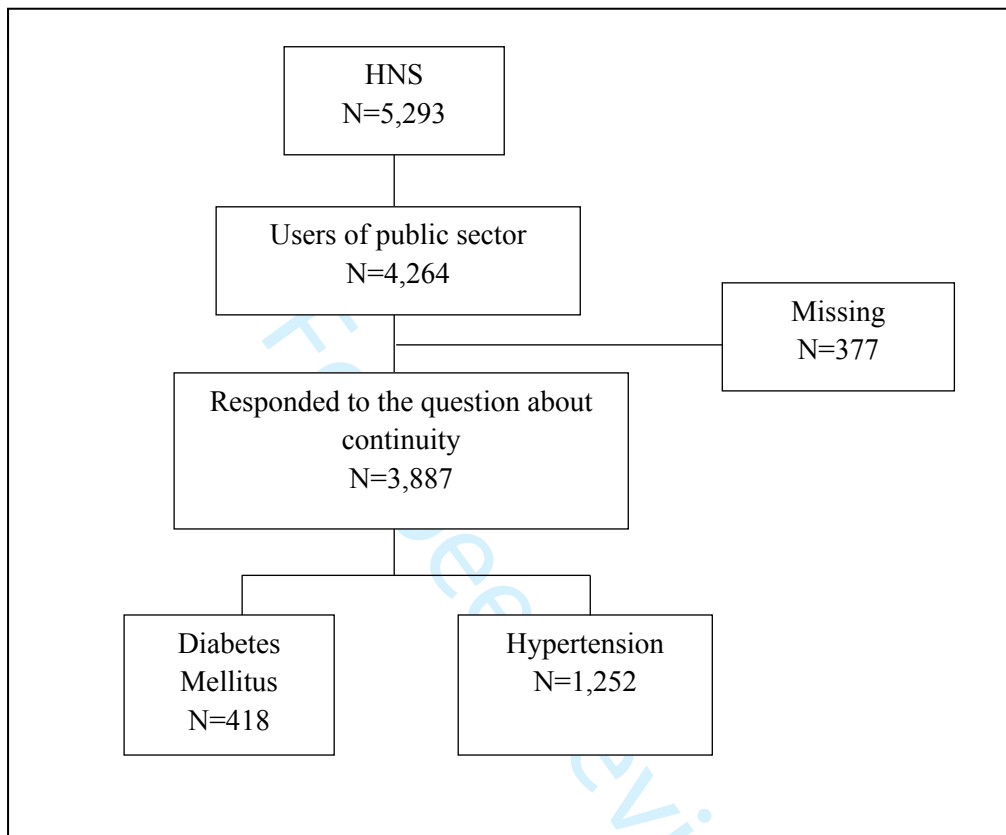

HNS: Health National Survey

**STROBE 2007 (v4) Statement—Checklist of items that should be included in reports of *cross-sectional studies***

| Section/Topic                | Item # | Recommendation                                                                                                                                                                       | Reported on page # |
|------------------------------|--------|--------------------------------------------------------------------------------------------------------------------------------------------------------------------------------------|--------------------|
| <b>Title and abstract</b>    | 1      | (a) Indicate the study's design with a commonly used term in the title or the abstract                                                                                               | 1                  |
|                              |        | (b) Provide in the abstract an informative and balanced summary of what was done and what was found                                                                                  | 2                  |
| <b>Introduction</b>          |        |                                                                                                                                                                                      |                    |
| Background/rationale         | 2      | Explain the scientific background and rationale for the investigation being reported                                                                                                 | 4                  |
| Objectives                   | 3      | State specific objectives, including any prespecified hypotheses                                                                                                                     | 4                  |
| <b>Methods</b>               |        |                                                                                                                                                                                      |                    |
| Study design                 | 4      | Present key elements of study design early in the paper                                                                                                                              | 5                  |
| Setting                      | 5      | Describe the setting, locations, and relevant dates, including periods of recruitment, exposure, follow-up, and data collection                                                      | 5                  |
| Participants                 | 6      | (a) Give the eligibility criteria, and the sources and methods of selection of participants                                                                                          | 5                  |
| Variables                    | 7      | Clearly define all outcomes, exposures, predictors, potential confounders, and effect modifiers. Give diagnostic criteria, if applicable                                             | 5-6                |
| Data sources/<br>measurement | 8*     | For each variable of interest, give sources of data and details of methods of assessment (measurement). Describe comparability of assessment methods if there is more than one group | 5-6                |
| Bias                         | 9      | Describe any efforts to address potential sources of bias                                                                                                                            | 5-7                |
| Study size                   | 10     | Explain how the study size was arrived at                                                                                                                                            | 5                  |
| Quantitative variables       | 11     | Explain how quantitative variables were handled in the analyses. If applicable, describe which groupings were chosen and why                                                         | 5-7                |
| Statistical methods          | 12     | (a) Describe all statistical methods, including those used to control for confounding                                                                                                | 6-7                |
|                              |        | (b) Describe any methods used to examine subgroups and interactions                                                                                                                  | 5-7                |
|                              |        | (c) Explain how missing data were addressed                                                                                                                                          | 5-7                |
|                              |        | (d) If applicable, describe analytical methods taking account of sampling strategy                                                                                                   | n/a                |
|                              |        | (e) Describe any sensitivity analyses                                                                                                                                                | n/a                |
| <b>Results</b>               |        |                                                                                                                                                                                      |                    |

|                          |     |                                                                                                                                                                                                              |                                       |
|--------------------------|-----|--------------------------------------------------------------------------------------------------------------------------------------------------------------------------------------------------------------|---------------------------------------|
| Participants             | 13* | (a) Report numbers of individuals at each stage of study—eg numbers potentially eligible, examined for eligibility, confirmed eligible, included in the study, completing follow-up, and analysed            | 7<br>Supplementary material, figure 1 |
|                          |     | (b) Give reasons for non-participation at each stage                                                                                                                                                         | 5-7                                   |
|                          |     | (c) Consider use of a flow diagram                                                                                                                                                                           | Supplementary material, figure 1      |
| Descriptive data         | 14* | (a) Give characteristics of study participants (eg demographic, clinical, social) and information on exposures and potential confounders                                                                     | Table 1                               |
|                          |     | (b) Indicate number of participants with missing data for each variable of interest                                                                                                                          | Table 1                               |
| Outcome data             | 15* | Report numbers of outcome events or summary measures                                                                                                                                                         | 7 and table 1                         |
| Main results             | 16  | (a) Give unadjusted estimates and, if applicable, confounder-adjusted estimates and their precision (eg, 95% confidence interval). Make clear which confounders were adjusted for and why they were included | Table 1 and 2                         |
|                          |     | (b) Report category boundaries when continuous variables were categorized                                                                                                                                    | 7                                     |
|                          |     | (c) If relevant, consider translating estimates of relative risk into absolute risk for a meaningful time period                                                                                             | n/a                                   |
| Other analyses           | 17  | Report other analyses done—eg analyses of subgroups and interactions, and sensitivity analyses                                                                                                               | n/a                                   |
| <b>Discussion</b>        |     |                                                                                                                                                                                                              |                                       |
| Key results              | 18  | Summarise key results with reference to study objectives                                                                                                                                                     | 11                                    |
| Limitations              | 19  | Discuss limitations of the study, taking into account sources of potential bias or imprecision. Discuss both direction and magnitude of any potential bias                                                   | 12-13                                 |
| 2 Interpretation         | 20  | Give a cautious overall interpretation of results considering objectives, limitations, multiplicity of analyses, results from similar studies, and other relevant evidence                                   | 13                                    |
| Generalisability         | 21  | Discuss the generalisability (external validity) of the study results                                                                                                                                        | 13                                    |
| <b>Other information</b> |     |                                                                                                                                                                                                              |                                       |
| Funding                  | 22  | Give the source of funding and the role of the funders for the present study and, if applicable, for the original study on which the present article is based                                                | 14                                    |

\*Give information separately for cases and controls in case-control studies and, if applicable, for exposed and unexposed groups in cohort and cross-sectional studies.

**Note:** An Explanation and Elaboration article discusses each checklist item and gives methodological background and published examples of transparent reporting. The STROBE checklist is best used in conjunction with this article (freely available on the Web sites of PLoS Medicine at <http://www.plosmedicine.org/>, Annals of Internal Medicine at <http://www.annals.org/>, and Epidemiology at <http://www.epidem.com/>). Information on the STROBE Initiative is available at [www.strobe-statement.org](http://www.strobe-statement.org).

# BMJ Open

## Continuity of care and delivery of diabetes and hypertensive care among regular users of primary care services in Chile, a cross-sectional study

|                                 |                                                                                                                                                                                                                                                                            |
|---------------------------------|----------------------------------------------------------------------------------------------------------------------------------------------------------------------------------------------------------------------------------------------------------------------------|
| Journal:                        | <i>BMJ Open</i>                                                                                                                                                                                                                                                            |
| Manuscript ID                   | bmjopen-2018-027830.R1                                                                                                                                                                                                                                                     |
| Article Type:                   | Research                                                                                                                                                                                                                                                                   |
| Date Submitted by the Author:   | 29-Mar-2019                                                                                                                                                                                                                                                                |
| Complete List of Authors:       | Leniz, Javiera; King's College London Faculty of Life Sciences and Medicine, School of Population Health and Environmental Sciences Gulliford, Martin; King's College London Faculty of Life Sciences and Medicine, School of Population Health and Environmental Sciences |
| <b>Primary Subject Heading</b>: | General practice / Family practice                                                                                                                                                                                                                                         |
| Secondary Subject Heading:      | Epidemiology, Cardiovascular medicine, Diabetes and endocrinology, Health services research                                                                                                                                                                                |
| Keywords:                       | continuity of care, disease management, diabetes mellitus, health survey, Hypertension < CARDIOLOGY                                                                                                                                                                        |
|                                 |                                                                                                                                                                                                                                                                            |

SCHOLARONE™  
Manuscripts

1  
2  
3 **Title: Continuity of care and delivery of diabetes and hypertensive care among regular users of**  
4 **primary care services in Chile, a cross-sectional study.**  
5  
6

7 **Authors:**  
8

- 9 1. Javiera Leniz, MSc Public Health student, King's College London, UK  
10  
11  
12 2. Professor Martin Gulliford, Professor of Public Health, School of Population Health and  
13 Environmental Sciences, King's College London, UK  
14  
15  
16  
17  
18

19 Corresponding author: Javiera Leniz, School of Population Health and Environmental Sciences,  
20 King's College London, Addison House, Guy's Campus, London, SE1 1UL, UK. Email  
21 [javiera.martelli@kcl.ac.uk](mailto:javiera.martelli@kcl.ac.uk), telephone number: +4402078485636  
22  
23  
24  
25

26 Word count: 3,348  
27  
28  
29  
30  
31  
32  
33  
34  
35  
36  
37  
38  
39  
40  
41  
42  
43  
44  
45  
46  
47  
48  
49  
50  
51  
52  
53  
54  
55  
56  
57  
58  
59  
60



## ABSTRACT

**Objectives:** explore factors related to continuity of care and its association with diabetes and hypertensive care, and disease control.

**Design:** cross-sectional study.

**Setting:** data from the Chilean Health National Survey 2009-2010.

**Participants:** regular users of primary care services aged 15 or older.

**Primary and secondary outcome measures:** proportion of hypertensive and diabetic patients with a blood pressure < 140/90 mmHg and HbA1c < 7.0% respectively, self-report of diagnosis, treatment, and recent foot and ophthalmologic exams. Associations between continuity of care, sociodemographic characteristics, and primary and secondary outcomes were explored using logistic regression.

**Results:** 3,887 primary care service users were included. 14.7% recognised a usual GP, 82.3% of them knew their name. Continuity of care was positively associated with age > 65 years (OR 4.81, 95% CI 3.16 to 7.32), being female (OR 1.66, 95% CI 1.34 to 2.05), retired (OR 2.22, 95% CI 1.75 to 2.83), obese (OR 1.66, 95% CI 1.29 to 2.14), high cardiovascular risk (OR 2.98, 95% CI 2.13 to 4.17) and widowed (OR 1.50, 95% CI 1.13 to 1.99), and negatively associated with educational level (8-12 vs <8 years OR 0.79, 95% CI 0.64 to 0.97), smoking (OR 0.65, 95% CI 0.52 to 0.82) and physical activity (OR 0.76, 95% CI 0.61 to 0.95). Continuity of care was associated with diagnosis (OR 2.83, 95% CI 1.21 to 6.63) and treatment awareness (OR 2.04, 95% CI 1.15 to 3.63), and a recent foot (OR 3.17, 95% CI 1.84 to 5.45) and ophthalmologic exam (OR 3.20, 95% CI 1.66 to 6.18) in diabetic but not in hypertensive patients.

**Conclusions:** Continuity of care was associated with higher odds of having a recent foot and ophthalmologic exam in patients with diabetes, but not with better diseases control. Findings suggest patients with chronic conditions have better continuity of care access.

## Keywords

Continuity of Patient Care; Chronic disease; Health surveys; Disease Management.

**Strengths and limitations of this study**

- First study that explores continuity of care and its relationship with health outcomes in Chile.
- The study uses a nationally representative population-based sample.
- The data used combine clinical and sociodemographic variables.
- The cross-sectional design of this study does not allow to attribute causal relationships.
- Some self-reported variables might be affected by recall bias.

For peer review only

## BACKGROUND

Chronic diseases and long-term conditions, including cancers and circulatory diseases, account for 19% of the global burden of disease, followed closely by mental disorders.<sup>1</sup> Despite the availability of effective treatment, a significant proportion of patients do not achieve adequate levels for disease control measures.<sup>2-5</sup> Effective preventive medical interventions are available for reducing the risk of complications and cardiovascular diseases.<sup>6-8</sup> Several authors have highlighted the role of the health system structure in the achievement of optimal outcomes for chronic diseases, especially in primary care.<sup>9-12</sup> One of the main attributes of a primary care-oriented service is the long-term person-focused care.<sup>11-13</sup>

Continuity of care can be defined as a long-term relationship between physicians and patients.<sup>14 15</sup> It has been associated with greater patient satisfaction, improved uptake of preventive services, lower rates of hospitalization and emergency department visits, and lower mortality rates.<sup>16-20</sup> Results from research focused on patients with chronic conditions suggest that continuity of care is correlated with fewer visits to emergency departments and better glycosylate haemoglobin (HbA1c) control in diabetic patients.<sup>21</sup> However, the evidence regarding the impact of continuity of care on health care outcomes is based mainly on studies from the United States, Canada or European countries. There is, therefore, an important gap of information regarding continuity of care in other settings. Due to the nature of the concept of continuity of care and the cultural differences that might determine patients and doctors' expectations about healthcare, evidence from developed countries might not be applicable in low-income contexts.

Chile is an OECD country where the burden of disease is similar to that observed in countries that are in an advanced stage of the epidemiological transition. Ischaemic heart diseases and stroke are the leading causes of death in the population, followed closely by cancer.<sup>22</sup> Even though continuity of care has been identified as a major challenge in Chile,<sup>23 24</sup> there are no studies assessing the level of relational continuity of care in the health system and their impact on clinical outcomes. The aim of this research is to explore factors related with different levels of continuity of care measured and its association with delivery of diabetes and hypertensive care and disease control in regular users of primary care in Chile.

## METHODS

This cross-sectional study drew on data from the last Health National Survey performed in Chile.

### **The Chilean Health National Survey 2009-2010.**

The second version of the Health National Survey was conducted in 2009 and commissioned by the Ministry of Health. The survey was designed to be nationally representative; individuals from the general population from 15 years old and older were included. The sample of the HNS 2009 was a multistage sample of households and disproportionately stratified by geographic region and urban/rural area, using the Census population as a frame. The response rate was 75.3%, and the loss rate after the recruitment was 8.7%. The final survey sample size includes 5,293 individuals. Survey instruments included 42 health problems, five physiological measurements, and 17 biochemical measurements.<sup>25</sup>

The survey participants were interviewed in their homes, with an average of two home visits per individual. During the first home visit, they were invited to participate, signed the informed consent and answered a validated questionnaire administrated by trained interviewers. Questions regarding whether individuals had been diagnosed with hypertension or diabetes, were receiving treatment for hypertension or diabetes and have had a foot and ophthalmologic exam were included in the questionnaire. During the second home visit, a trained nurse performed blood and urine samples. Blood glucose and glycated haemoglobin (HbA1c) were estimated from that sample. Participants were asked during the first visit to do not eat any food 11 hours prior the second visit and participants with a diagnosis of diabetes were scheduled for the first visit in the morning. During this second visit, anthropometric measures were taken, including height, weight and blood pressure. Three measurements of blood pressure were obtained, prior to five minutes resting and with an interval of two minutes between each measurement. An automatic pressure sphygmomanometer was used (Omron HEM 742 ®).<sup>25</sup>

### **Population and sample**

For this study, only patients with public insurance were analysed because the questions regarding continuity of care were asked only to regular users of primary care services deliver by the government, with correspond to 80% of the overall population in the survey. Individuals were considered as having hypertension if they had a mean systolic blood pressure higher than 140 mmHg and/or a mean diastolic blood pressure higher than 90 mmHg or were receiving pharmacological treatment at the time of the survey. Individuals were considered as having diabetes mellitus if they had fasting blood glucose higher than 126 mg/dl or reported that they had been diagnosed with diabetes before the visit.

1  
2  
3 A sample size was calculated for diabetes control and systolic blood pressure as the main outcomes.  
4 The study had more than 80% power to detect odds ratios of 1.5 and above.  
5

## 6 7 **Instruments and measurements**

### 8 9 Continuity of Care

10  
11  
12 Two questions were used to assess the level of continuity of care among participants. The first one was  
13 'Do you have your 'own' general doctor or family doctor? The question specified in brackets that a  
14 general doctor is the one they can appeal to solve the majority of their health problems. The second  
15 question asked whether or not individuals who referred having an 'own doctor' also knew the name of  
16 that doctor. A measure of continuity of care was constructed from these two questions. Three  
17 categories of continuity of care were considered. First, individuals who reported having a GP whose  
18 name they know. Second, individuals who report having a GP, but do not know his/her name. And  
19 finally, individuals who do not have a particular GP.  
20  
21  
22  
23  
24  
25

### 26 27 Primary and secondary outcome variables

28  
29 The primary outcomes were the proportion of hypertensive patients with a systolic and diastolic blood  
30 pressure less than 140mmHg and 90mmHg respectively, and the proportion of diabetic patients with an  
31 HbA1c < 7.0% (53 mmol/mol).  
32  
33

34  
35 Hypertension and diabetes care was assessed using the self-reported questions from the questionnaire.  
36 The proportion of individuals who referred having received a diagnosed of hypertension or diabetes  
37 and the proportion of individuals who referred having received treatment were included as secondary  
38 outcomes, as well as the proportion of diabetic patients who referred have had a foot examination in  
39 the last year, and an ophthalmologic exam in the last 2 years.  
40  
41  
42  
43

### 44 45 Co-variables

46  
47 Cardiovascular risk was calculated from data related to the individual's age, cholesterol level, smoking  
48 status and blood pressure using the Framingham equation. Individuals with a probability of having a  
49 cardiovascular event less than 10%, between 10% and 20%, and more than 20% in 10 years, were  
50 considered as having a low, high, and very high cardiovascular risk respectively. The Spanish version of  
51 the global physical activity questionnaire (GPAQ) was used. The GPAQ considers three domains of  
52 physical activity: at work while commuting and during recreational activity. The sum of the three  
53 activities determines the level of physical activity of an individual. A tobacco exposure module was  
54 included in the first visit that considered basic questions about smoking, based on the minimum  
55  
56  
57  
58  
59  
60

1  
2  
3 instrument (core questions) surveillance smoking used by the Pan-American health organization. The  
4 questions identified two categories: current smoker (daily and occasional) and former smoker.  
5  
6

## 7 **Analysis**

8  
9 A descriptive analysis was performed for all variables included in the study according to the level of  
10 continuity of care. Univariate analysis using logistic regression was performed to evaluate the  
11 association between continuity of care and categorical variables. And ANOVA test was performed to  
12 analyse the association between continuous variables with continuity of care. Demographic variables  
13 that were associated with both continuity of care and the outcomes were considered as possible  
14 confounders and were therefore used to fix the model for multivariate analysis. A multivariate logistic  
15 regression analysis was used to explore the relationship between the level of continuity of care and the  
16 different outcomes, adjusting for confounders. A backward approach was used to fix the multivariate  
17 logistic regression. All variables that were related to continuity of care and the respective outcome  
18 were included in the first model. Explanatory variables were kept in the model based on a priori  
19 hypothesis and significance in multivariate analysis ( $p$ -value < 0.2). Individuals that did not respond to  
20 the question 'Do you have a family physician or GP?' were excluded from the analysis. The 0.99.902 - ©  
21 2009-2016 version of the statistical software R was used for the analysis.  
22  
23  
24  
25  
26  
27  
28  
29  
30  
31

## 32 **Patient and Public involvement**

33  
34  
35 Patient or public were not involved in this study.  
36  
37

## 38 **RESULTS**

39  
40 A total of 4,264 individuals from the Health National Survey reported having a public insurance and  
41 were selected for the current study. Among them, 3,887 individuals responded to the question 'Do you  
42 have you a family physician or GP?', and therefore, 377 individuals were excluded and considered as  
43 missing values (Supplementary material, figure 1).  
44  
45  
46  
47

48 There were 572(14.7%) of the individuals included in the Health National Survey who affirmed having a  
49 GP as a usual doctor, and 471(82.3%) of these affirmed knowing the name of their doctor (Table 1).  
50 Individuals who indicated having a GP as a usual doctor and knowing their name had greater odds of  
51 age greater than 65 years (OR 4.81, 95% CI 3.16 to 7.32), female gender (OR 1.66, 95% CI 1.34 to 2.05),  
52 being widowed (OR 1.50, 95% CI 1.13 to 1.99), being retired (OR 2.22, 95% CI 1.75 to 2.83), having a  
53 high (OR 1.88, 95% CI 1.53 to 2.32) or very high cardiovascular risk (OR 2.98, 95% CI 2.13 to 4.17), or  
54 having a BMI > 30 (OR 1.66, 95% CI 1.29 to 2.14). Individuals with more than eight years of education,  
55 single people, and those with moderate and high level of physical activity were less likely to mention  
56  
57  
58  
59  
60

1  
2  
3 having a GP as a usual doctor. Recognizing the name of their regular doctor was also highly associated  
4 with cardiovascular risk factors, with lower odds of having a high level of physical activity, greater odds  
5 of being obese or having a diagnosis of diabetes or hypertension. Having a regular doctor was not  
6 associated with rurality or household income (Table 1).  
7  
8  
9  
10  
11  
12  
13  
14  
15  
16  
17  
18  
19  
20  
21  
22  
23  
24  
25  
26  
27  
28  
29  
30  
31  
32  
33  
34  
35  
36  
37  
38  
39  
40  
41  
42  
43  
44  
45  
46  
47  
48  
49  
50  
51  
52  
53  
54  
55  
56  
57  
58  
59  
60

For peer review only

**Table 1. Univariate association between level of continuity of care and categorical variables.**

|                              | Do you have your family doctor?                        |                               |                               |                                  |                           | OR (95% CI)         | OR (95% CI) |
|------------------------------|--------------------------------------------------------|-------------------------------|-------------------------------|----------------------------------|---------------------------|---------------------|-------------|
|                              | No                                                     | Yes, but not know the name    | Yes, and know the name        | Yes, but do not know the name/No | Yes, and know the name/No |                     |             |
|                              | (n=3,315)<br>n (%) <sup>a</sup>                        | (n=101)<br>n (%) <sup>a</sup> | (n=471)<br>n (%) <sup>a</sup> |                                  |                           |                     |             |
| Age                          |                                                        |                               |                               |                                  |                           |                     |             |
|                              | <25                                                    | 546 (16.5)                    | 9 (8.9)                       | 28 (5.9)                         | Ref                       | Ref                 |             |
|                              | 25 to 45                                               | 1,128 (34.0)                  | 26 (25.7)                     | 124 (26.3)                       | 1.40 (0.66 to 3.01)       | 2.14 (1.40 to 3.27) |             |
|                              | 46 to 65                                               | 1,041 (31.4)                  | 40 (39.6)                     | 124 (36.3)                       | 2.33 (1.12 to 4.84)       | 3.20 (2.12 to 4.84) |             |
|                              | >66                                                    | 600 (18.1)                    | 26 (25.7)                     | 148 (31.4)                       | 2.63 (1.22 to 5.66)       | 4.81 (3.16 to 7.32) |             |
| Rurality (yes)               |                                                        | 574 (17.3)                    | 25 (24.8)                     | 81 (17.2)                        | 1.57 (0.99 to 2.49)       | 0.99 (0.77 to 1.28) |             |
| Sex (Female)                 |                                                        | 2,005 (60.5)                  | 69 (68.3)                     | 338 (71.8)                       | 1.41 (0.92 to 2.16)       | 1.66 (1.34 to 2.05) |             |
| Marital Status               |                                                        |                               |                               |                                  |                           |                     |             |
|                              | Married                                                | 1,804 (54.4)                  | 56 (55.4)                     | 262 (55.6)                       | Ref                       | Ref                 |             |
|                              | Separated or Divorced                                  | 287 (8.7)                     | 10 (9.9)                      | 51 (10.8)                        | 1.12 (0.57 to 2.23)       | 1.22 (0.88 to 1.69) |             |
|                              | Single                                                 | 885 (26.7)                    | 20 (19.8)                     | 84 (17.8)                        | 0.73 (0.43 to 1.22)       | 0.65 (0.50 to 0.85) |             |
|                              | Widowed                                                | 339 (10.2)                    | 15 (14.9)                     | 74 (15.7)                        | 1.43 (0.80 to 2.55)       | 1.50 (1.13 to 1.99) |             |
| Educational level            |                                                        |                               |                               |                                  |                           |                     |             |
|                              | < 8 years                                              | 1,018 (30.7)                  | 44 (43.6)                     | 162 (34.5)                       | Ref                       | Ref                 |             |
|                              | 8 - 12 years                                           | 1,892 (57.1)                  | 52 (51.5)                     | 237 (50.4)                       | 0.64 (0.42 to 0.96)       | 0.79 (0.64 to 0.97) |             |
|                              | >12 years                                              | 402 (12.1)                    | 5 (5.0)                       | 71 (15.1)                        | 0.29 (0.11 to 0.73)       | 1.11 (0.82 to 1.50) |             |
| Occupation                   |                                                        |                               |                               |                                  |                           |                     |             |
|                              | Worker                                                 | 1,499 (45.5)                  | 38 (37.6)                     | 177 (37.7)                       | Ref                       | Ref                 |             |
|                              | Not worker                                             | 1,237 (37.6)                  | 40 (39.6)                     | 147 (31.3)                       | 1.28 (0.81 to 2.00)       | 1.01 (0.8 to 1.27)  |             |
|                              | Retired                                                | 556 (16.9)                    | 23 (22.8)                     | 146 (31.1)                       | 1.63 (0.96 to 2.76)       | 2.22 (1.75 to 2.83) |             |
| Cardiovascular risk          |                                                        |                               |                               |                                  |                           |                     |             |
|                              | Low                                                    | 1,799 (54.3)                  | 43 (42.6)                     | 174 (36.9)                       | Ref                       | Ref                 |             |
|                              | High                                                   | 1,322 (39.9)                  | 47 (46.5)                     | 241 (51.2)                       | 1.49 (0.98 to 2.27)       | 1.88 (1.53 to 2.32) |             |
|                              | Very High                                              | 194 (5.9)                     | 11 (10.9)                     | 56 (11.9)                        | 2.37 (1.20 to 4.68)       | 2.98 (2.13 to 4.17) |             |
| Level of physical activity   |                                                        |                               |                               |                                  |                           |                     |             |
|                              | Low                                                    | 1,013 (31.3)                  | 45 (45.5)                     | 162 (35.9)                       | Ref                       | Ref                 |             |
|                              | Moderate                                               | 625 (19.3)                    | 17 (17.2)                     | 95 (21.1)                        | 0.61 (0.35 to 1.08)       | 0.95 (0.72 to 1.25) |             |
|                              | High                                                   | 1,601 (49.4)                  | 37 (37.4)                     | 194 (43.0)                       | 0.52 (0.33 to 0.81)       | 0.76 (0.61 to 0.95) |             |
| Current smoker (yes)         |                                                        | 1,140 (35.2)                  | 30 (30.9)                     | 120 (26.3)                       | 0.82 (0.53 to 1.27)       | 0.65 (0.52 to 0.82) |             |
| Nutritional status           |                                                        |                               |                               |                                  |                           |                     |             |
|                              | BMI <25                                                | 943 (31.3)                    | 20 (22.5)                     | 112 (25.7)                       | Ref                       | Ref                 |             |
|                              | BMI 25 to 29.9                                         | 1,199 (39.8)                  | 35 (39.3)                     | 151 (34.7)                       | 1.38 (0.80 to 2.40)       | 1.06 (0.82 to 1.37) |             |
|                              | BMI >30                                                | 873 (29.0)                    | 34 (38.2)                     | 172 (39.5)                       | 1.84 (1.05 to 3.22)       | 1.66 (1.29 to 2.14) |             |
| Household income             |                                                        |                               |                               |                                  |                           |                     |             |
|                              | US\$<374                                               | 2,084 (64.9)                  | 78 (78.8)                     | 278 (61.2)                       | Ref                       | Ref                 |             |
|                              | US\$ 374 to 1268                                       | 1,072 (33.4)                  | 19 (19.2)                     | 163 (35.9)                       | 0.47 (0.29 to 0.79)       | 1.14 (0.93 to 1.40) |             |
|                              | >US\$1268                                              | 55 (1.7)                      | 2 (2.0)                       | 13 (2.9)                         | 0.97 (0.23 to 4.06)       | 1.77 (0.96 to 3.28) |             |
| DM diagnosis (Yes)           |                                                        | 328 (11.1)                    | 15 (17.4)                     | 75 (17.3)                        | 1.70 (0.96 to 2.99)       | 1.68 (1.27 to 2.20) |             |
|                              | Years since diagnosis DM (mean (sd)) (n=327)           | 8.8(9.9)                      | 9.3(5.9)                      | 10.9(9.0)                        |                           |                     |             |
|                              | HbA1c (mean (sd)) (n=348)                              | 8.4(2.5)                      | 7.8(2.2)                      | 8.8(2.4)                         |                           |                     |             |
| Hypertension diagnosis (Yes) |                                                        | 994 (32.2)                    | 38 (40.0)                     | 220 (49.4)                       | 1.40 (0.93 to 2.13)       | 2.06 (1.68 to 2.52) |             |
|                              | Years since diagnosis hypertension (mean (sd)) (n=872) | 11.1(12.2)                    | 13.6(15.0)                    | 10.7(9.8)                        |                           |                     |             |
|                              | PAS (mmHg) (mean(sd)) (n=1,194)                        | 152.0(21.6)                   | 149.7(23.8)                   | 150.5(20.4)                      |                           |                     |             |
|                              | PAD (mmHg) (mean(sd)) (n=1,194)*                       | 84.4(11.9)                    | 80.9(12.0)                    | 81.9(11.6)                       |                           |                     |             |

<sup>a</sup> column percent. BMI: Body mass index; DM: diabetes mellitus; Ref: reference. \*ANOVA p-value<0.01



1  
2  
3 A total of 418 (10.8%) diabetic and 1,252 (32.2%) hypertensive individuals were identified in the survey.  
4  
5 Among individuals classified as having diabetes, 324 (78.6%) were aware of a diabetes diagnosis, and  
6  
7 234 (56.0%) were receiving pharmacological treatment at the time of the survey. Among individuals  
8  
9 classified as having hypertension, 891 (71.2%) were aware of a hypertension diagnosis, and 565 (45.1%)  
10  
11 were receiving pharmacological treatment at the time of the survey.

12  
13 There were 90(21.5%) diabetic patients that referred to having a usual GP. Continuity of care was not  
14  
15 associated with optimal levels of glyceemic control (Table 2). Individuals that had a personal GP and  
16  
17 knew their name were 2.04 (95% CI 1.15 to 3.63) more likely to be receiving pharmacological treatment  
18  
19 for diabetes and 2.83 (95% CI 1.21 to 6.63) more likely of being aware of their diagnosis than individuals  
20  
21 without a usual GP, after adjusting for confounders. They were also more likely to have had a recent  
22  
23 foot exam (OR 0.67, 95% CI 0.36 to 1.23) and a recent ophthalmologic exam (OR 3.17, 95% CI 1.84 to  
24  
25 5.45) than individuals without a usual GP.

26  
27 There were 258(20.6%) hypertensive patients that referred to having a usual GP. Continuity of care was  
28  
29 not associated with being more aware of their diagnosis, receiving pharmacological treatment or better  
30  
31 blood pressure control for these patients (Table 2).  
32  
33  
34  
35  
36  
37  
38  
39  
40  
41  
42  
43  
44  
45  
46  
47  
48  
49  
50  
51  
52  
53  
54  
55  
56  
57  
58  
59  
60

**Table 2. Univariate and multivariate logistic regression between relational continuity of care and cardiovascular outcomes.**

|                                                            |                    |                    |                               |                        | Univariate                       |                           | Multivariate                  |                        |
|------------------------------------------------------------|--------------------|--------------------|-------------------------------|------------------------|----------------------------------|---------------------------|-------------------------------|------------------------|
|                                                            |                    | No                 | Yes, but do not know the name | Yes, and know the name | Yes, but do not know the name/No | Yes, and know the name/No | Yes, but do not know the name | Yes, and know the name |
|                                                            | n (%) <sup>a</sup> | n (%) <sup>a</sup> | n (%) <sup>a</sup>            | OR (95% CI)            | OR (95% CI)                      | OR (95% CI)               | OR (95% CI)                   |                        |
| Patients with knowledge of their diagnosis of DM-2         |                    |                    |                               |                        |                                  |                           |                               |                        |
|                                                            | No                 | 79 (89.8)          | 2 (2.3)                       | 7 (8.0)                | Ref                              | Ref                       | Ref <sup>1</sup>              | Ref <sup>1</sup>       |
|                                                            | Yes                | 245 (75.6)         | 13 (4.0)                      | 66 (20.4)              | 2.10 (0.46 to 9.49)              | 3.04 (1.34 to 6.90)       | 1.68 (0.34 to 8.40)           | 2.83 (1.21 to 6.63)    |
| Patients under treatment for DM-2                          |                    |                    |                               |                        |                                  |                           |                               |                        |
|                                                            | No                 | 158 (85.9)         | 5 (2.7)                       | 21 (11.4)              | Ref                              | Ref                       | Ref <sup>2</sup>              | Ref <sup>2</sup>       |
|                                                            | Yes                | 170 (72.6)         | 10 (4.3)                      | 54 (23.1)              | 1.86 (0.62 to 5.56)              | 2.39 (1.40 to 4.14)       | 1.71 (0.53 to 5.44)           | 2.04 (1.15 to 3.63)    |
| Patients with diagnosis of diabetes and HbA1c <7%          |                    |                    |                               |                        |                                  |                           |                               |                        |
|                                                            | No                 | 164 (76.6)         | 7 (3.3)                       | 43 (20.1)              | Ref                              | Ref                       | Ref <sup>3</sup>              | Ref <sup>3</sup>       |
|                                                            | Yes                | 108 (80.6)         | 6 (4.5)                       | 20 (14.9)              | 1.30 (0.43 to 3.98)              | 0.71 (0.39 to 1.27)       | 1.48 (0.43 to 5.13)           | 0.67 (0.36 to 1.23)    |
| Diabetic patients with last FE <1 year ago                 |                    |                    |                               |                        |                                  |                           |                               |                        |
|                                                            | No                 | 208 (86.7)         | 6 (2.5)                       | 26 (10.8)              | Ref                              | Ref                       | Ref <sup>4</sup>              | Ref <sup>4</sup>       |
|                                                            | Yes                | 120 (67.4)         | 9 (5.1)                       | 49 (27.5)              | 2.60 (0.90 to 7.48)              | 3.27 (1.93 to 5.53)       | 2.38 (0.81 to 7.00)           | 3.17 (1.84 to 5.45)    |
| Diabetic patients with last OE <2 years ago                |                    |                    |                               |                        |                                  |                           |                               |                        |
|                                                            | No                 | 197 (83.8)         | 6 (2.6)                       | 32 (13.6)              | Ref                              | Ref                       | Ref <sup>5</sup>              | Ref <sup>5</sup>       |
|                                                            | Yes                | 129 (71.3)         | 9 (5.0)                       | 43 (23.8)              | 3.30 (1.03 to 10.60)             | 3.43 (1.87 to 6.30)       | 3.67 (1.03 to 13.04)          | 3.20 (1.66 to 6.18)    |
| Patients with knowledge of their diagnosis of hypertension |                    |                    |                               |                        |                                  |                           |                               |                        |
|                                                            | No                 | 300 (83.1)         | 8 (2.2)                       | 53 (14.7)              | Ref                              | Ref                       | Ref <sup>6</sup>              | Ref <sup>6</sup>       |
|                                                            | Yes                | 694 (77.9)         | 30 (3.4)                      | 167 (18.7)             | 1.62 (0.75 to 3.58)              | 1.36 (0.97 to 1.91)       | 1.43 (0.60 to 3.42)           | 1.15 (0.80 to 1.67)    |
| Patients report receiving treatment for hypertension       |                    |                    |                               |                        |                                  |                           |                               |                        |
|                                                            | No                 | 568 (82.7)         | 14 (2.0)                      | 105 (15.3)             | Ref                              | Ref                       | Ref <sup>7</sup>              | Ref <sup>7</sup>       |
|                                                            | Yes                | 426 (75.4)         | 24 (4.2)                      | 115 (20.4)             | 2.29 (1.17 to 4.47)              | 1.46 (1.09 to 1.96)       | 2.19 (1.10 to 4.40)           | 1.25 (0.91 to 1.71)    |
| Patients with diagnoses of hypertension and BP <140/90     |                    |                    |                               |                        |                                  |                           |                               |                        |
|                                                            | No                 | 819 (79.4)         | 29 (2.8)                      | 184 (17.8)             | Ref                              | Ref                       | Ref <sup>8</sup>              | Ref <sup>8</sup>       |
|                                                            | Yes                | 175 (79.5)         | 9 (4.1)                       | 36 (16.4)              | 1.45 (0.68 to 3.12)              | 0.92 (0.62 to 1.36)       | 1.83 (0.80 to 4.16)           | 0.65 (0.42 to 1.02)    |

<sup>a</sup> row percent. DM-2: diabetes mellitus type 2, HbA1c: Glycosilate haemoglobine, FE: Foot examination, OE: ophthalmologic examination, BP: Blood pressure. 1 Adjusted for age, sex, marital status, physical activity and smoking status 2 Adjusted for age, sex, marital status, educational level and smoking status. 3 Adjusted for age, sex, smoking status and BMI. 4 Adjusted for age, sex, marital status and occupation. 5 Adjusted for age, sex, occupation and BMI. 6 Adjusted for age, sex, marital status, educational level, BMI, smoking status and occupation. 7 Adjusted for age, sex, marital status, educational level, occupation and smoking status. 8 Adjusted for age, sex, marital status, educational level, BMI and physical activity.

## DISCUSSION

### Summary of findings

This study evaluated continuity of care and its relationship with health outcomes in the Chilean public health sector. Continuity of care in this study was positively associated with age, sex, occupation, nutritional, cardiovascular risk and marital status, and negatively associated with educational level, smoking and physical activity. Patients with diabetes or hypertension diagnosis were more likely to know the name of their usual GP. In diabetic patients, continuity of care was associated with receiving treatment and being aware of diabetes diagnosis, and higher odds of having a recent foot and ophthalmologic exam. In hypertensive patients, continuity of care was not associated with higher odds of being aware of their diagnosis, receiving pharmacological treatment or better levels of blood pressure control.

Individuals that knew the name of their usual GP were more likely to be retired, widowed and older, which might have some implications regarding access to healthcare. People without a regular job might have more time to ask for an appointment or attend medical appointments. However, it is likely that being retired is also associated with age and chronic conditions. It is also possible that older adults might have a greater preference for having a usual GP and they consequently make efforts to achieve a better continuity of care. Individuals who knew the name of their usual GP were more likely to have high cardiovascular risk factors, such as having a diagnosis of diabetes, hypertension, obesity and lower levels of physical activity. This association could be explained because health care provision is usually based on need, and therefore, patients with chronic conditions tend to have better access to health care and visit their doctor more regularly than other non-chronic patients. However, in absolute terms, only around 20% of patients with diabetes and hypertension in this study referred to know the name and having a regular doctor.

Diabetic patients that referred to have a usual GP and knowing the name of their doctor were 3.2 times (95% CI 1.66 to 6.18) more likely to have had a foot examination in the last year and 3.17 times (95% CI 1.84 to 5.45) more likely to have had an ophthalmologic examination in the last 2 years. These findings are consistent with those found in two other studies,<sup>26,27</sup> and suggest patients with a better continuity of care might receive better quality of care. Consultations with the same physician over time might contribute to having better coordination of care, and therefore might facilitate the delivery of appropriate and timely preventive services for diabetes care. Nevertheless, it is not possible to rule out the possibility of a spurious association between foot examination, ophthalmological exam and continuity due to recall bias. The uptake of both services in this study was assessed through individuals' self-report. Patients with a usual GP could have a different care-seeking pattern that predisposes them

1  
2  
3 to be more concerned about their health and therefore remembered more easily whether they have  
4 had a foot examination or not, compared to patients without a usual provider. A more objective  
5 measure of foot and ophthalmological exam, such as information from administrative data, could help  
6 to assess the possibility of recall bias.  
7  
8

9  
10 This study failed to prove an association between continuity of care and better patients outcomes such  
11 as diabetes and hypertension control. This probably could be explained because health care centres  
12 prioritise appointments and follow-ups for patients with poor clinical outcomes to improve their  
13 management. However, the cross-sectional design of this study does not allow to attribute a causal  
14 relationship to this association. These results are consistent with those found in Gulliford et al.<sup>28</sup> and  
15 O'Connor et al.,<sup>27</sup> where experienced continuity of care was not associated with the level of HbA1c. But  
16 differ from those obtained in two other observational studies where individuals with a usual provider  
17 had 6.69 more chances to have an Hb1C level below 7%,<sup>29</sup> or better continuity score was statistically  
18 associated with lower levels of HbA1c.<sup>30</sup> Results from these studies are difficult to compare due to the  
19 fact that they used different measurements for continuity of care, as well as different methodologies.  
20  
21

22  
23 The fact that some individuals know or not know the name of their usual doctor, could be perceived as  
24 constituting different levels of continuity of care, assuming that patients that know the name of their  
25 doctors have a stronger relationship with them. However, the results fail to show any gradient effect  
26 among the different levels of continuity of care used in the study. These results might be explained by  
27 the low number of individuals belonging to that category. Only 101(2.6%) persons in the sample  
28 referred to having their GP but not knowing his/her name.  
29  
30

31  
32 The proportion of individuals that referred to having a usual GP in this sample was unusually low  
33 (14.7%). Studies from the US and the UK have reported much higher rates of having a regular doctor,  
34 between 44% and 86%.<sup>29 31 32</sup> While there might be methodological differences that can explain these  
35 disparate results, it is highly possible that these discrepancies can be explained by differences in the  
36 structure and resources of the health care system among countries. Chile reported some physicians per  
37 1,000 population of 1.87 in 2013, in contrast with 3.72 and 3.3 per 1,000 population in the UK and the  
38 US respectively.<sup>33</sup> Therefore, it is possible that the lower density of physicians in the country hinders the  
39 ability to maintain an adequate continuity of care, giving priority to maintaining adequate access to  
40 health care. In addition, differences in health care resources and treatments in different settings might  
41 limit the generalizability of these findings.  
42  
43  
44  
45  
46  
47  
48  
49  
50  
51  
52  
53  
54  
55

## 56 **Strengths and limitations**

57  
58  
59  
60

1  
2  
3 The measure of continuity of care used in the study has some limitations that can account for these  
4 results. Patients' report of provider affiliation does not capture the length and strength of that  
5 relationship, which seems to be a major dimension of continuity of care. Additionally, recognizing a  
6 usual provider does not necessarily imply frequent consultations or real contact with the provider, nor  
7 the quality of care provided, factors that could be substantial in improving health outcomes. Many  
8 other measures of continuity of care have been described in the literature. Nevertheless, no other  
9 single measure has proven to be superior to the others or capture the whole concept of continuity of  
10 care. The measure of continuity used in this analysis has the advantage of considering the patient's  
11 perspective and of being easy to implement and simple to understand and has been widely employed in  
12 the literature allowing comparisons with other studies.<sup>34-38</sup>

13  
14  
15  
16  
17  
18  
19  
20 As in any observational epidemiological study, unmeasured confounders might have biased the  
21 associations found in this study. Patients with better continuity of care were more likely to have being  
22 receiving pharmacological treatment for their disease. The cross-sectional design of this study cannot  
23 rule out the possibility that patients with a diagnosis of diabetes and hypertension had a better  
24 continuity of care as a consequence of the process of monitoring the disease treatment, due to lack  
25 of temporality in the measurement of both variables. We did not have information about the type  
26 of treatment each patient was receiving or the appropriateness of that treatment and therefore, it  
27 was not possible to account for the fact that some individuals might have been receiving  
28 pharmacological schemes that might be more effective to achieve control of the disease. We did  
29 not have either information on physicians' characteristics that might influence the quality of care  
30 received by patients.

## 31 32 33 34 35 36 37 38 39 40 41 **CONCLUSIONS**

42  
43 Continuity of care was associated with higher odds of having a recent foot and ophthalmologic exam in  
44 patients with diabetes, but not with better diseases control. Differences in the age and occupation  
45 among individuals with a regular GP might be related with the presence of a chronic condition. Findings  
46 suggest patients with chronic conditions have better access to continuity of care.

47  
48  
49  
50  
51 Results showed an association between continuity of care and the proportion of diabetic users of the  
52 public health services in Chile receiving treatment for their diseases. However, by measuring both, the  
53 dependent and independent variables at the same time, it is not possible to rule out the possibility of  
54 reverse causation.

55  
56  
57  
58  
59 Only a minority of participants in this survey referred to have a regular doctor. However, the majority of  
60 them are also able to identify their doctor's name. It would be recommendable to explore strategies

1  
2  
3 that might improve the level of continuity of care experienced by users of the public health care sector  
4 in Chile, such as incentives to improve the availability of physicians in the public sector and reducing the  
5 practice size.  
6  
7

8  
9 Further investigation that incorporates a longitudinal approach would be necessary to clarify whether  
10 or not continuity of care has an impact on health care outcomes in Chile.  
11  
12  
13  
14  
15  
16  
17  
18  
19  
20  
21  
22  
23  
24  
25  
26  
27  
28  
29  
30  
31  
32  
33  
34  
35  
36  
37  
38  
39  
40  
41  
42  
43  
44  
45  
46  
47  
48  
49  
50  
51  
52  
53  
54  
55  
56  
57  
58  
59  
60

For peer review only

## STATEMENTS

### Ethics approval

The Health National Survey 2009-2010 was approved by the Pontifical Catholic University of Chile Ethic Committee and the Ministry of Health on 2009. The authors of the study confirmed that they had guarded the autonomy and confidentiality of patients. The database is anonymized, and therefore there is no access to the identity of the participants. Furthermore, this study does not consider additional data collection. In consideration of that, this study does not require additional ethical approval.

### Consent for publication

Not applicable

### Data sharing statement

The data that support the findings of this study are available from the Epidemiology Department, Ministry of Health in Chile but restrictions apply to the availability of these data, which were used under license for the current study, and so are not publicly available. Data are however available from the authors upon reasonable request and with permission of the Ministry of Health in Chile.

### Competing interest

The author(s) declare(s) that they have no competing interests.

### Funding

JL was funded by CONICYT, Programa Formacion de Capital Humano Avanzado, Magister Becas Chile, 2015, Folio 73161335.

### Author contributions

JL contributed to the design, data analysis, interpretation and writing of first and subsequent drafts of the paper. MG contributed to the design, data analysis, interpretation and comments on the first and subsequent drafts of the paper.

### Acknowledgements

1  
2  
3 The authors would like to acknowledge the support provided by the Epidemiology Department from the  
4 Ministry of Health in Chile, by facilitating the access to the database of the National Health Survey 2009-  
5 2010 and in particular, to Dr. Dario Lopez.  
6  
7

8 I would like to express my special gratitude to Dr. Paula Margozzini from the Public Health Department  
9 at the Pontifical Catholic University of Chile, for providing the contact with the National Health Survey  
10 team, facilitating the access to the Survey questionnaires and her technical support with some specific  
11 aspects of the Survey.  
12  
13  
14

## 15 REFERENCES

- 16  
17  
18  
19 1. Murray CJ, Vos T, Lozano R, et al. Disability-adjusted life years (DALYs) for 291 diseases and injuries in  
20 21 regions, 1990-2010: a systematic analysis for the Global Burden of Disease Study 2010.  
21 *Lancet (London, England)* 2012;380(9859):2197-223. doi: 10.1016/s0140-6736(12)61689-4  
22 [published Online First: 2012/12/19]  
23  
24
- 25  
26  
27 2. de Pablos-Velasco P, Parhofer KG, Bradley C, et al. Current level of glycaemic control and its  
28 associated factors in patients with type 2 diabetes across Europe: data from the PANORAMA  
29 study. *Clinical endocrinology* 2014;80(1):47-56. doi: 10.1111/cen.12119 [published Online First:  
30 2012/12/01]  
31  
32
- 33  
34  
35 3. Egan BM, Li J, Qanungo S, et al. Blood pressure and cholesterol control in hypertensive  
36 hypercholesterolemic patients: national health and nutrition examination surveys 1988-2010.  
37 *Circulation* 2013;128(1):29-41. doi: 10.1161/circulationaha.112.000500 [published Online First:  
38 2013/07/03]  
39  
40
- 41  
42  
43 4. Fox KM, Gerber Pharmd RA, Bolinder B, et al. Prevalence of inadequate glycemic control among  
44 patients with type 2 diabetes in the United Kingdom general practice research database: A  
45 series of retrospective analyses of data from 1998 through 2002. *Clinical therapeutics*  
46 2006;28(3):388-95. doi: 10.1016/j.clinthera.2006.03.005 [published Online First: 2006/06/06]  
47  
48
- 49  
50  
51 5. Kontopantelis E, Springate D, Reeves D, et al. Withdrawing performance indicators: retrospective  
52 analysis of general practice performance under UK Quality and Outcomes Framework. *BMJ*  
53 (*Clinical research ed*) 2014;348:g330. doi: 10.1136/bmj.g330 [published Online First:  
54 2014/01/29]  
55  
56
- 57  
58  
59 6. Standards of Medical Care in Diabetes—2014. *Diabetes Care* 2014;37(Supplement 1):S14. doi:  
60 10.2337/dc14-S014



- 1  
2  
3 7. Dorresteijn JAN, Kriegsman DMW, Assendelft WJJ, et al. Patient education for preventing diabetic  
4 foot ulceration. *Cochrane Database of Systematic Reviews* 2014(12) doi:  
5 10.1002/14651858.CD001488.pub5  
6  
7
- 8  
9 8. Nelson KE, Hersh AL, Nkoy FL, et al. Primary care physician smoking screening and counseling for  
10 patients with chronic disease. *Preventive medicine* 2015;71:77-82. doi:  
11 10.1016/j.ypmed.2014.11.010 [published Online First: 2014/12/03]  
12  
13
- 14  
15 9. Grembowski D, Schaefer J, Johnson KE, et al. A conceptual model of the role of complexity in the care  
16 of patients with multiple chronic conditions. *Medical care* 2014;52 Suppl 3:S7-s14. doi:  
17 10.1097/mlr.0000000000000045 [published Online First: 2014/02/25]  
18  
19
- 20  
21 10. Milani RV, Lavie CJ. Health care 2020: reengineering health care delivery to combat chronic disease.  
22 *The American journal of medicine* 2015;128(4):337-43. doi: 10.1016/j.amjmed.2014.10.047  
23 [published Online First: 2014/12/03]  
24  
25
- 26  
27 11. Starfield B, Shi L, Macinko J. Contribution of primary care to health systems and health. *The Milbank*  
28 *quarterly* 2005;83(3):457-502. doi: 10.1111/j.1468-0009.2005.00409.x [published Online First:  
29 2005/10/06]  
30  
31
- 32  
33 12. Wagner EH, Austin BT, Von Korff M. Organizing care for patients with chronic illness. *The Milbank*  
34 *quarterly* 1996;74(4):511-44. [published Online First: 1996/01/01]  
35  
36
- 37  
38 13. Starfield B. Primary care: an increasingly important contributor to effectiveness, equity, and  
39 efficiency of health services. SESPAS report 2012. *Gaceta sanitaria* 2012;26 Suppl 1:20-6. doi:  
40 10.1016/j.gaceta.2011.10.009 [published Online First: 2012/01/24]  
41  
42
- 43  
44 14. Gulliford M, Naithani S, Morgan M. What is 'continuity of care'? *Journal of health services research*  
45 *& policy* 2006;11(4):248-50. doi: 10.1258/135581906778476490 [published Online First:  
46 2006/10/05]  
47  
48
- 49  
50 15. Haggerty JL, Reid RJ, Freeman GK, et al. Continuity of care: a multidisciplinary review. *BMJ (Clinical*  
51 *research ed)* 2003;327(7425):1219-21. doi: 10.1136/bmj.327.7425.1219 [published Online First:  
52 2003/11/25]  
53  
54
- 55  
56 16. Cabana MD, Jee SH. Does continuity of care improve patient outcomes? *The Journal of family*  
57 *practice* 2004;53(12):974-80. [published Online First: 2004/12/08]  
58  
59  
60

- 1  
2  
3 17. Pereira Gray DJ, Sidaway-Lee K, White E, et al. Continuity of care with doctors-a matter of life and  
4 death? A systematic review of continuity of care and mortality. *BMJ open* 2018;8(6):e021161.  
5 doi: 10.1136/bmjopen-2017-021161 [published Online First: 2018/07/01]  
6  
7
- 8  
9 18. Sandall J, Soltani H, Gates S, et al. Midwife-led continuity models versus other models of care for  
10 childbearing women. *The Cochrane database of systematic reviews* 2016;4:Cd004667. doi:  
11 10.1002/14651858.CD004667.pub5 [published Online First: 2016/04/29]  
12  
13
- 14  
15 19. Saultz JW, Lochner J. Interpersonal continuity of care and care outcomes: a critical review. *Annals of*  
16 *family medicine* 2005;3(2):159-66. doi: 10.1370/afm.285 [published Online First: 2005/03/31]  
17  
18
- 19  
20 20. Wasson JH, Sauvigne AE, Mogielnicki RP, et al. Continuity of outpatient medical care in elderly men.  
21 A randomized trial. *Jama* 1984;252(17):2413-7. [published Online First: 1984/11/02]  
22  
23
- 24  
25 21. Continuity of care to optimize chronic disease management in the community setting: an evidence-  
26 based analysis. *Ontario health technology assessment series* 2013;13(6):1-41. [published Online  
27 First: 2013/10/30]  
28  
29
- 30  
31 22. DEIS. Estadísticas de Mortalidad. Departamento de Estadísticas e Información en Salud. Gobierno de  
32 Chile 2014 [Available from: [www.deis.cl/estadisticas-mortalidad/](http://www.deis.cl/estadisticas-mortalidad/).]  
33
- 34  
35 23. Orrego C, Arancibia A, Contreras JL, et al. Fortalecimiento de la atención primaria de salud:  
36 propuestas para mejorar el sistema sanitario chileno. Temas de la agenda pública. Centro de  
37 Políticas Públicas. Pontificia Universidad Católica de Chile 2014 [Available from:  
38 [https://politicaspublicas.uc.cl/wp-content/uploads/2015/02/fortalecimiento-de-la-atencion-](https://politicaspublicas.uc.cl/wp-content/uploads/2015/02/fortalecimiento-de-la-atencion-primaria-de-salud-propuestas-para-mejorar-el-sistema-sanitario.pdf)  
39 [primaria-de-salud-propuestas-para-mejorar-el-sistema-sanitario.pdf](https://politicaspublicas.uc.cl/wp-content/uploads/2015/02/fortalecimiento-de-la-atencion-primaria-de-salud-propuestas-para-mejorar-el-sistema-sanitario.pdf) accessed 15-03 2019.  
40  
41  
42
- 43  
44 24. Montero J, Tellez A, Herrera C. Reforma sanitaria chilena y la atención primaria de salud. Algunos  
45 aspectos críticos. Temas de la agenda pública. Centro de Políticas Públicas. Pontificia  
46 Universidad Católica de Chile 2010 [Available from: [https://politicaspublicas.uc.cl/wp-](https://politicaspublicas.uc.cl/wp-content/uploads/2015/02/reforma-sanitaria-chilena-y-la-atencion-primaria-de-salud.pdf)  
47 [content/uploads/2015/02/reforma-sanitaria-chilena-y-la-atencion-primaria-de-salud.pdf](https://politicaspublicas.uc.cl/wp-content/uploads/2015/02/reforma-sanitaria-chilena-y-la-atencion-primaria-de-salud.pdf)  
48 accessed 15-03 2019.  
49  
50
- 51  
52 25. MINSAL. Encuesta Nacional de Salud ENS Chile 2009-2010. Ministerio de Salud. Gobierno de Chile  
53 2010 [Available from:  
54 <http://web.minsal.cl/portal/url/item/bcb03d7bc28b64dfe040010165012d23.pdf> accessed 15-  
55 03 2019.  
56  
57  
58  
59  
60

- 1  
2  
3 26. Kitpinyochai T, Paisansudhi S, Washirasaksiri C, et al. Clinical outcomes of type 2 diabetic patients  
4 before and after attending Siriraj Continuity of Care clinic. *Journal of the Medical Association of*  
5 *Thailand = Chotmai het thangphaet* 2013;96 Suppl 2:S82-90. [published Online First:  
6 2013/04/18]  
7  
8  
9  
10  
11 27. O'Connor PJ, Desai J, Rush WA, et al. Is having a regular provider of diabetes care related to  
12 intensity of care and glycemic control? *The Journal of family practice* 1998;47(4):290-7.  
13 [published Online First: 1998/10/28]  
14  
15  
16  
17 28. Gulliford MC, Naithani S, Morgan M. Continuity of care and intermediate outcomes of type 2  
18 diabetes mellitus. *Family practice* 2007;24(3):245-51. doi: 10.1093/fampra/cmm014 [published  
19 Online First: 2007/05/12]  
20  
21  
22  
23 29. Mainous AG, 3rd, Koopman RJ, Gill JM, et al. Relationship between continuity of care and diabetes  
24 control: evidence from the Third National Health and Nutrition Examination Survey. *American*  
25 *journal of public health* 2004;94(1):66-70. [published Online First: 2004/01/10]  
26  
27  
28  
29 30. Parchman ML, Pugh JA, Noel PH, et al. Continuity of care, self-management behaviors, and glucose  
30 control in patients with type 2 diabetes. *Medical care* 2002;40(2):137-44. [published Online  
31 First: 2002/01/22]  
32  
33  
34  
35 31. Xu KT. Usual source of care in preventive service use: a regular doctor versus a regular site. *Health*  
36 *services research* 2002;37(6):1509-29. [published Online First: 2003/01/28]  
37  
38  
39 32. Lambrew JM, DeFries GH, Carey TS, et al. The effects of having a regular doctor on access to  
40 primary care. *Medical care* 1996;34(2):138-51. [published Online First: 1996/02/01]  
41  
42  
43 33. OECD. OECD Health Statistics 2015 [Available from: [http://www.oecd-ilibrary.org/social-issues-](http://www.oecd-ilibrary.org/social-issues-migration-health/data/oecd-health-statistics/oecd-health-data-health-care-utilisation_data-00542-en?isPartOf=/content/datacollection/health-data-en)  
44 [migration-health/data/oecd-health-statistics/oecd-health-data-health-care-utilisation\\_data-](http://www.oecd-ilibrary.org/social-issues-migration-health/data/oecd-health-statistics/oecd-health-data-health-care-utilisation_data-00542-en?isPartOf=/content/datacollection/health-data-en)  
45 [00542-en?isPartOf=/content/datacollection/health-data-en](http://www.oecd-ilibrary.org/social-issues-migration-health/data/oecd-health-statistics/oecd-health-data-health-care-utilisation_data-00542-en?isPartOf=/content/datacollection/health-data-en). accessed 15-03 2019.  
46  
47  
48  
49 34. Kogan MD, Alexander GR, Teitelbaum MA, et al. The effect of gaps in health insurance on continuity  
50 of a regular source of care among preschool-aged children in the United States. *Jama*  
51 1995;274(18):1429-35. [published Online First: 1995/11/08]  
52  
53  
54  
55 35. Hemingway H, Saunders D, Parsons L. Social class, spoken language and pattern of care as  
56 determinants of continuity of carer in maternity services in east London. *Journal of public*  
57 *health medicine* 1997;19(2):156-61. [published Online First: 1997/06/01]  
58  
59  
60

- 1  
2  
3 36. Donahue KE, Ashkin E, Pathman DE. Length of patient-physician relationship and patients'  
4 satisfaction and preventive service use in the rural south: a cross-sectional telephone study.  
5 *BMC family practice* 2005;6:40-40. doi: 10.1186/1471-2296-6-40  
6  
7  
8  
9 37. Haggerty JL, Pineault R, Beaulieu MD, et al. Practice features associated with patient-reported  
10 accessibility, continuity, and coordination of primary health care. *Annals of family medicine*  
11 2008;6(2):116-23. doi: 10.1370/afm.802 [published Online First: 2008/03/12]  
12  
13  
14  
15 38. Adler R, Vasiliadis A, Bickell N. The relationship between continuity and patient satisfaction: a  
16 systematic review. *Family practice* 2010;27(2):171-8. doi: 10.1093/fampra/cmp099 [published  
17 Online First: 2010/01/08]  
18  
19  
20  
21  
22  
23  
24  
25  
26  
27  
28  
29  
30  
31  
32  
33  
34  
35  
36  
37  
38  
39  
40  
41  
42  
43  
44  
45  
46  
47  
48  
49  
50  
51  
52  
53  
54  
55  
56  
57  
58  
59  
60

## SUPPLEMENTARY MATERIAL

**Figure 1. Flowchart of the sample included in the study.**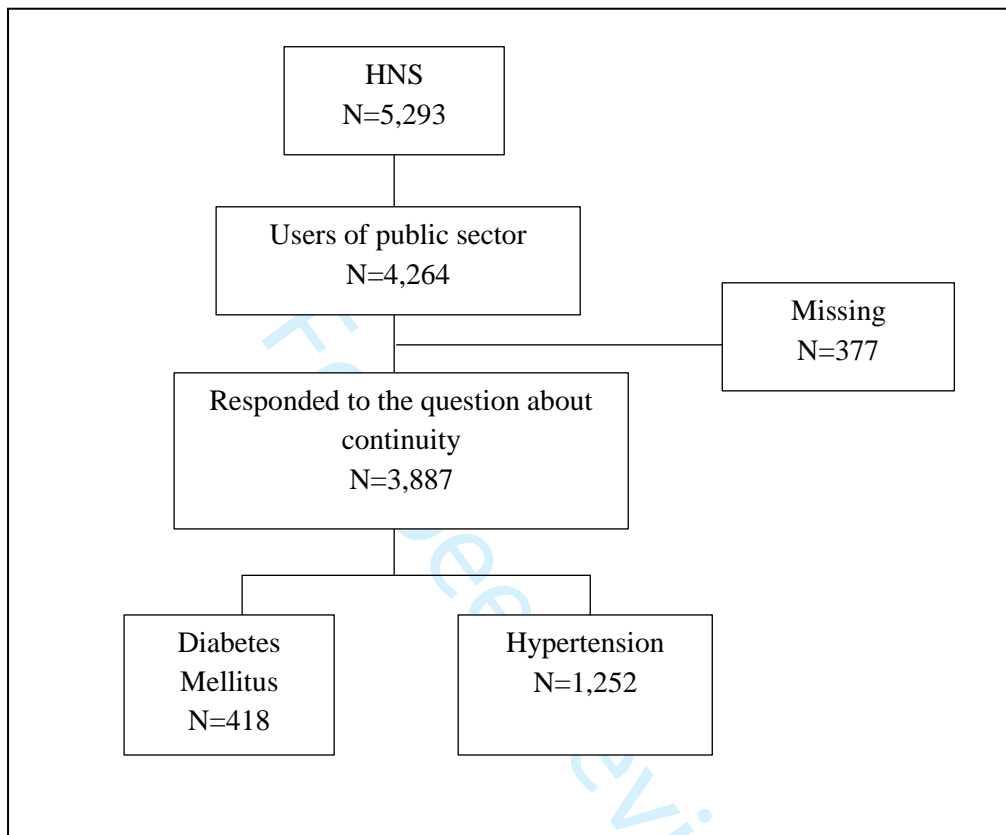

HNS: Health National Survey

**STROBE 2007 (v4) Statement—Checklist of items that should be included in reports of *cross-sectional studies***

| Section/Topic                | Item # | Recommendation                                                                                                                                                                       | Reported on page #          |
|------------------------------|--------|--------------------------------------------------------------------------------------------------------------------------------------------------------------------------------------|-----------------------------|
| <b>Title and abstract</b>    | 1      | (a) Indicate the study’s design with a commonly used term in the title or the abstract                                                                                               | 1                           |
|                              |        | (b) Provide in the abstract an informative and balanced summary of what was done and what was found                                                                                  | 2                           |
| <b>Introduction</b>          |        |                                                                                                                                                                                      |                             |
| Background/rationale         | 2      | Explain the scientific background and rationale for the investigation being reported                                                                                                 | 4                           |
| Objectives                   | 3      | State specific objectives, including any prespecified hypotheses                                                                                                                     | 4                           |
| <b>Methods</b>               |        |                                                                                                                                                                                      |                             |
| Study design                 | 4      | Present key elements of study design early in the paper                                                                                                                              | 5                           |
| Setting                      | 5      | Describe the setting, locations, and relevant dates, including periods of recruitment, exposure, follow-up, and data collection                                                      | 5-6                         |
| Participants                 | 6      | (a) Give the eligibility criteria, and the sources and methods of selection of participants                                                                                          | 5                           |
| Variables                    | 7      | Clearly define all outcomes, exposures, predictors, potential confounders, and effect modifiers. Give diagnostic criteria, if applicable                                             | 5-7                         |
| Data sources/<br>measurement | 8*     | For each variable of interest, give sources of data and details of methods of assessment (measurement). Describe comparability of assessment methods if there is more than one group | 5-7                         |
| Bias                         | 9      | Describe any efforts to address potential sources of bias                                                                                                                            | 5-7                         |
| Study size                   | 10     | Explain how the study size was arrived at                                                                                                                                            | 6                           |
| Quantitative variables       | 11     | Explain how quantitative variables were handled in the analyses. If applicable, describe which groupings were chosen and why                                                         | 5-7                         |
| Statistical methods          | 12     | (a) Describe all statistical methods, including those used to control for confounding                                                                                                | 7                           |
|                              |        | (b) Describe any methods used to examine subgroups and interactions                                                                                                                  | 5-7                         |
|                              |        | (c) Explain how missing data were addressed                                                                                                                                          | 5-7. Supplementary material |
|                              |        | (d) If applicable, describe analytical methods taking account of sampling strategy                                                                                                   | n/a                         |
|                              |        | (e) Describe any sensitivity analyses                                                                                                                                                | n/a                         |

1  
2  
3  
4  
5  
6  
7  
8  
9  
10  
11  
12  
13  
14  
15  
16  
17  
18  
19  
20  
21  
22  
23  
24  
25  
26  
27  
28  
29  
30  
31  
32  
33  
34  
35  
36  
37  
38  
39  
40  
41  
42  
43  
44  
45  
46

|                          |     |                                                                                                                                                                                                              |                             |
|--------------------------|-----|--------------------------------------------------------------------------------------------------------------------------------------------------------------------------------------------------------------|-----------------------------|
| <b>Results</b>           |     |                                                                                                                                                                                                              |                             |
| Participants             | 13* | (a) Report numbers of individuals at each stage of study—eg numbers potentially eligible, examined for eligibility, confirmed eligible, included in the study, completing follow-up, and analysed            | 7<br>Supplementary material |
|                          |     | (b) Give reasons for non-participation at each stage                                                                                                                                                         | 5-7                         |
|                          |     | (c) Consider use of a flow diagram                                                                                                                                                                           | Supplementary material      |
| Descriptive data         | 14* | (a) Give characteristics of study participants (eg demographic, clinical, social) and information on exposures and potential confounders                                                                     | Table 1                     |
|                          |     | (b) Indicate number of participants with missing data for each variable of interest                                                                                                                          | Table 1                     |
| Outcome data             | 15* | Report numbers of outcome events or summary measures                                                                                                                                                         | 7-10 and table 1            |
| Main results             | 16  | (a) Give unadjusted estimates and, if applicable, confounder-adjusted estimates and their precision (eg, 95% confidence interval). Make clear which confounders were adjusted for and why they were included | Table 1 and 2               |
|                          |     | (b) Report category boundaries when continuous variables were categorized                                                                                                                                    | 7-8                         |
|                          |     | (c) If relevant, consider translating estimates of relative risk into absolute risk for a meaningful time period                                                                                             | n/a                         |
| Other analyses           | 17  | Report other analyses done—eg analyses of subgroups and interactions, and sensitivity analyses                                                                                                               | n/a                         |
| <b>Discussion</b>        |     |                                                                                                                                                                                                              |                             |
| Key results              | 18  | Summarise key results with reference to study objectives                                                                                                                                                     | 12                          |
| Limitations              | 19  | Discuss limitations of the study, taking into account sources of potential bias or imprecision. Discuss both direction and magnitude of any potential bias                                                   | 12-14                       |
| 2Interpretation          | 20  | Give a cautious overall interpretation of results considering objectives, limitations, multiplicity of analyses, results from similar studies, and other relevant evidence                                   | 12-14                       |
| Generalisability         | 21  | Discuss the generalisability (external validity) of the study results                                                                                                                                        | 13                          |
| <b>Other information</b> |     |                                                                                                                                                                                                              |                             |
| Funding                  | 22  | Give the source of funding and the role of the funders for the present study and, if applicable, for the original study on which the present article is based                                                | 16                          |

\*Give information separately for cases and controls in case-control studies and, if applicable, for exposed and unexposed groups in cohort and cross-sectional studies.

1  
2  
3  
4  
5  
6  
7  
8  
9  
10  
11  
12  
13  
14  
15  
16  
17  
18  
19  
20  
21  
22  
23  
24  
25  
26  
27  
28  
29  
30  
31  
32  
33  
34  
35  
36  
37  
38  
39  
40  
41  
42  
43  
44  
45  
46

**Note:** An Explanation and Elaboration article discusses each checklist item and gives methodological background and published examples of transparent reporting. The STROBE checklist is best used in conjunction with this article (freely available on the Web sites of PLoS Medicine at <http://www.plosmedicine.org/>, Annals of Internal Medicine at <http://www.annals.org/>, and Epidemiology at <http://www.epidem.com/>). Information on the STROBE Initiative is available at [www.strobe-statement.org](http://www.strobe-statement.org).

For peer review only
