# Supplementary material for: Continuity of care and delivery of diabetes and hypertensive care among regular users of primary care services in Chile: a cross-sectional study
Source: PubMed Central journal article supplement — BMJ Open. 2019 Oct 28;9(10):e027830. doi: 10.1136/bmjopen-2018-027830 (PMC6830596; doi:10.1136/bmjopen-2018-027830), 2019-10-28
Supplement: bmjopen-2018-027830supp001.pdf [file bmjopen-2018-027830supp001.pdf]

## SUPPLEMENTARY MATERIAL

Figure 1. Flowchart of the sample included in the study.

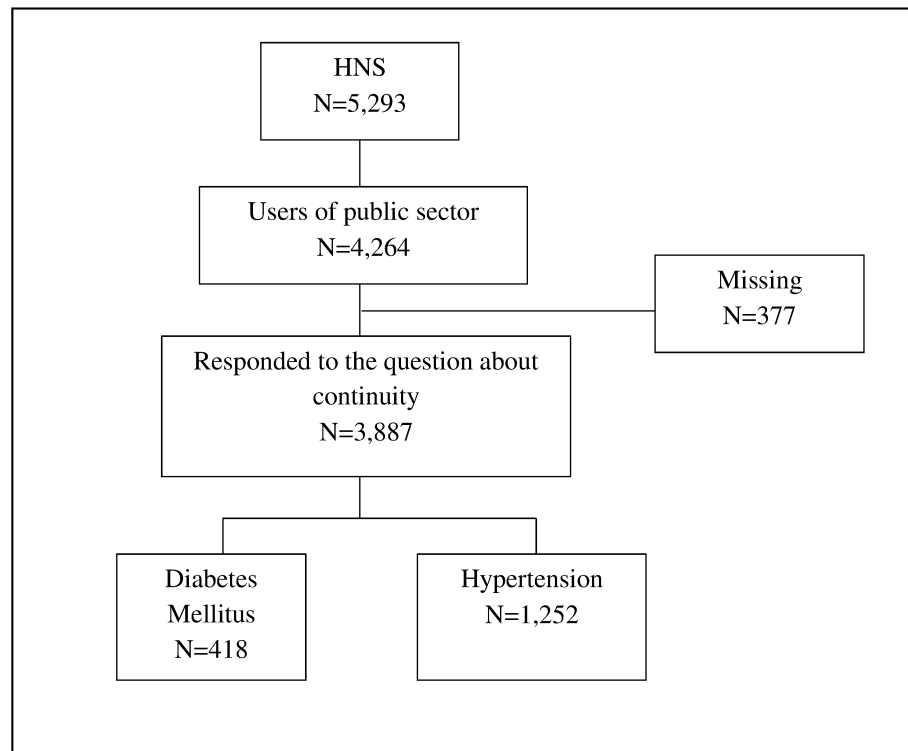

HNS: Health National Survey
